# Supplementary material for: Deciphering the Potential Pharmaceutical Mechanism of Chinese Traditional Medicine (Gui-Zhi-Shao-Yao-Zhi-Mu) on Rheumatoid Arthritis
Source: PubMed Central journal article supplement (PMC4776278; doi:10.1038/srep22602), 2016-03-03
Supplement: srep22602-s1.pdf [file srep22602-s1.pdf]

# **Deciphering the Potential Pharmaceutical Mechanism of Chinese Traditional Medicine (Gui-Zhi-Shao-Yao-Zhi-Mu) on Rheumatoid Arthritis**

Lin Huang<sup>1, #</sup>, Qi Lv<sup>2, 3, #</sup>, Duoli Xie<sup>1</sup>, Tieliu Shi<sup>2, 4\*</sup>, Chengping Wen<sup>1, \*</sup>

<sup>1</sup>TCM Clinical Basis Institute, Zhejiang Chinese Medicine University, 548 Binwen Road, Hangzhou, Zhejiang, 310000, China.

<sup>2</sup>Center for Bioinformatics and Computational Biology, and the Institute of Biomedical Sciences, School of Life Science, East China Normal University, 500 Dongchuan Road, Shanghai, 200241, China.

<sup>3</sup>School of Finance and Statistics, East China Normal University, 500 Dongchuan Road, Shanghai, 200241, China.

<sup>4</sup>Biological Targeting Diagnosis and Therapy Research Center, Guangxi Medical University, Nanning, Guangxi, 530021, China.

<sup>#</sup>These authors contributed equally to this work.

Correspondence and requests for materials should be addressed to T.S. (email: [tlshi@bio.ecnu.edu.cn](mailto:tlshi@bio.ecnu.edu.cn)) and C.W. (email: [wengcp@163.com](mailto:wengcp@163.com)).

**Supplement Figure S1** The relationship between compounds sharing more than 102 targets.

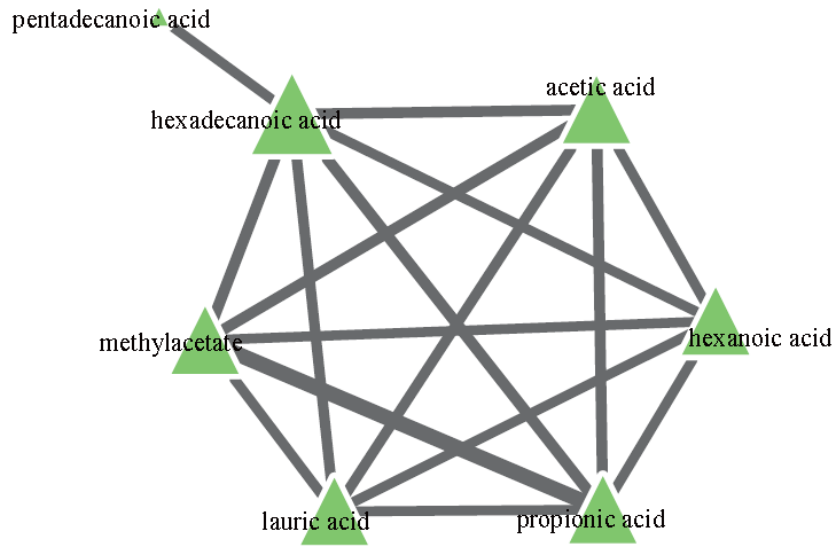

**Supplement Figure S2** The group terms of GO enrichment analysis of the formula targets.

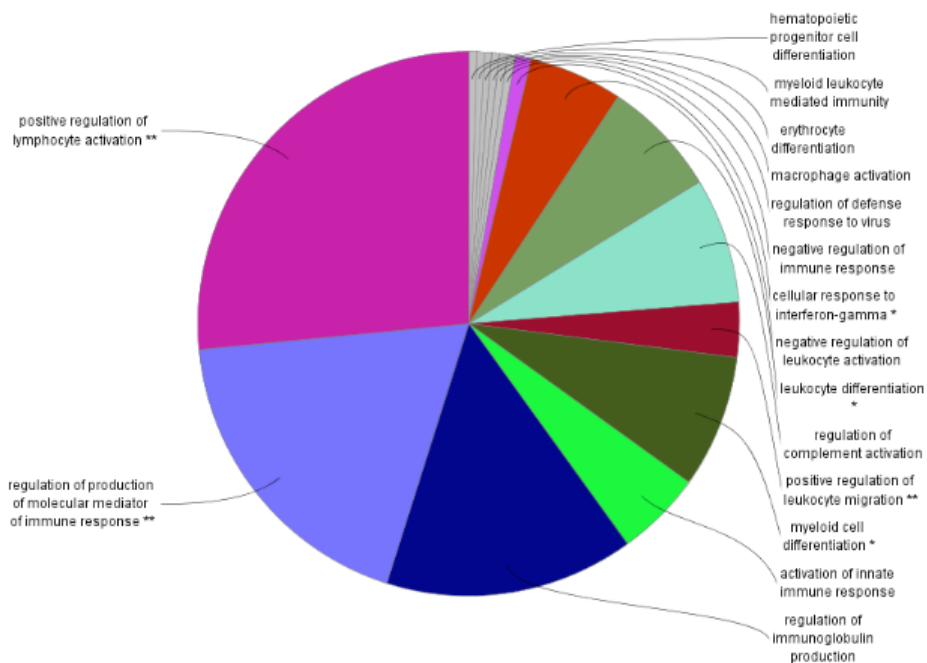

**Supplement Figure S3** The expression changes of GSZ targets, drug targets and RA disease genes before and after treatment in RA sample.

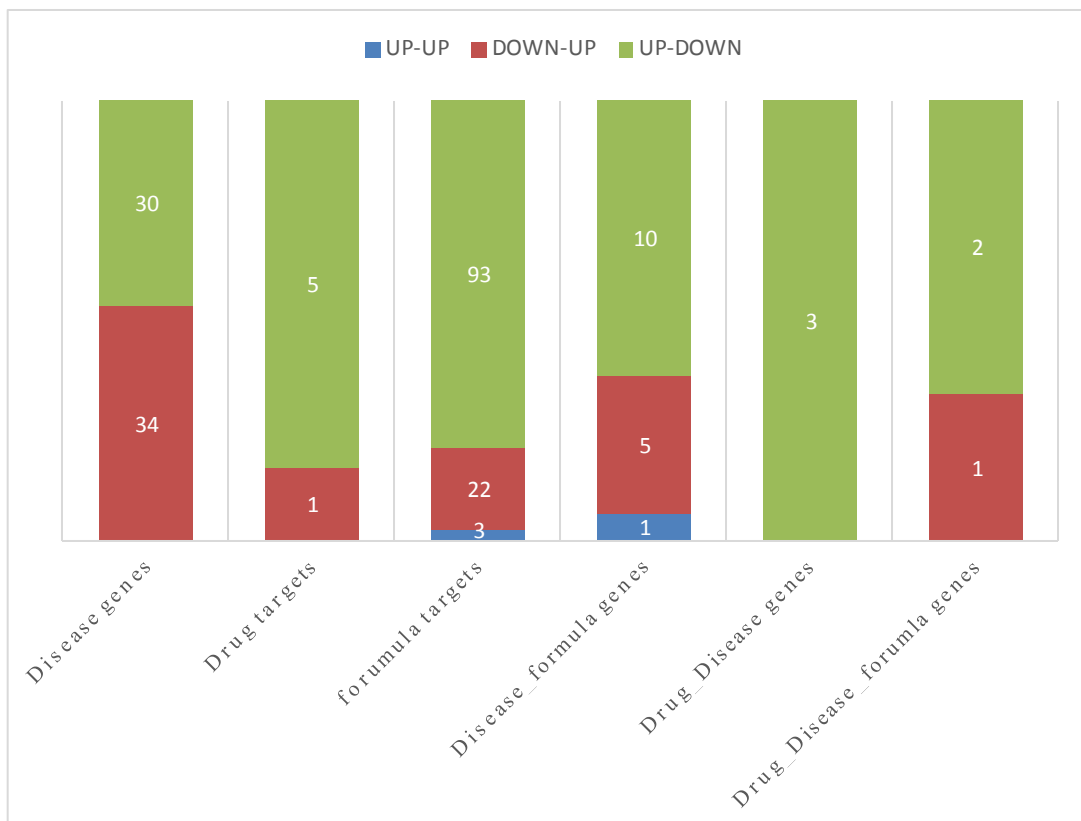

**Supplementary Table S1** Detailed description of herbs and compounds in GSZ formula. The compounds of nine herbs were downloaded from TCMID for further analysis. Totally 673 different compounds were retrieved.

| <b>herb</b>                  | <b>compound</b>                              |
|------------------------------|----------------------------------------------|
| Radix Glycyrrhizae Preparata | rutin                                        |
| Radix Glycyrrhizae Preparata | schaftoside                                  |
| Radix Glycyrrhizae Preparata | isoschaftoside                               |
| Radix Glycyrrhizae Preparata | 18alpha-glycyrrhetic acid                    |
| Radix Glycyrrhizae Preparata | narcissin                                    |
| Radix Glycyrrhizae Preparata | glycyrrhizin                                 |
| Radix Glycyrrhizae Preparata | isoquercitrin                                |
| Radix Glycyrrhizae Preparata | astragalin                                   |
| Radix Glycyrrhizae Preparata | ononin                                       |
| Radix Glycyrrhizae Preparata | 18beta-glycyrrhetic acid                     |
| Radix Glycyrrhizae Preparata | glycyrrhetic acid                            |
| Aconitum carmichaeli         | 6-demethyl-desoline                          |
| Aconitum carmichaeli         | 14-o-veratroylneoline                        |
| Aconitum carmichaeli         | 14-o-cinnamoylneoline                        |
| Aconitum carmichaeli         | delcorine                                    |
| Aconitum carmichaeli         | deltamine                                    |
| Aconitum carmichaeli         | aconitine                                    |
| Aconitum carmichaeli         | aconine                                      |
| Aconitum carmichaeli         | deltaline                                    |
| Aconitum carmichaeli         | bullatine b                                  |
| Aconitum carmichaeli         | bullatine c                                  |
| Aconitum carmichaeli         | lipohypaconitine                             |
| Aconitum carmichaeli         | lipo-14-o-anisoylbikhaconine                 |
| Aconitum carmichaeli         | karakoline                                   |
| Aconitum carmichaeli         | higenamine                                   |
| Aconitum carmichaeli         | demethylcoclaurine                           |
| Aconitum carmichaeli         | neokadsuranic acid b                         |
| Aconitum carmichaeli         | delphatine                                   |
| Aconitum carmichaeli         | demethylde lavaine a                         |
| Aconitum carmichaeli         | demethylde lavaine b                         |
| Aconitum carmichaeli         | neojiangyouaconitine                         |
| Aconitum carmichaeli         | denudatine                                   |
| Aconitum carmichaeli         | coryneine                                    |
| Aconitum carmichaeli         | 8-deoxy-14-dehydro-aconosine                 |
| Aconitum carmichaeli         | ignavine                                     |
| Aconitum carmichaeli         | lipmesaconitine                              |
| Aconitum carmichaeli         | 3-acetylaconitine                            |
| Aconitum carmichaeli         | salsolinol                                   |
| Aconitum carmichaeli         | coryneine chloride                           |
| Aconitum carmichaeli         | 2,7-dideacetyl-2,7-dibenzoyl-taxayunnanine f |
| Aconitum carmichaeli         | m-aminophenol                                |
| Aconitum carmichaeli         | higeamine                                    |
| Aconitum carmichaeli         | delphin                                      |
| Aconitum carmichaeli         | neojianyouaconitine                          |
| Aconitum carmichaeli         | dictysine                                    |

|                      |                                                |
|----------------------|------------------------------------------------|
| Aconitum carmichaeli | mescaline                                      |
| Aconitum carmichaeli | 13-deoxo-13 alpha-acetyloxy-1-deoxynortaxine i |
| Aconitum carmichaeli | isotalatizidine                                |
| Aconitum carmichaeli | tamarixinol (i)                                |
| Aconitum carmichaeli | karanjin                                       |
| Aconitum carmichaeli | vilmorrianine c                                |
| Aconitum carmichaeli | 14-o-anisoylneoline                            |
| Aconitum carmichaeli | para-aminophenol                               |
| Aconitum carmichaeli | karacoline                                     |
| Aconitum carmichaeli | hyaconitine                                    |
| Aconitum carmichaeli | mesaconitine                                   |
| Aconitum carmichaeli | hypaphorine                                    |
| Aconitum carmichaeli | aconitan                                       |
| Aconitum carmichaeli | fuzinoside                                     |
| Aconitum carmichaeli | mesaconine                                     |
| Aconitum carmichaeli | delbrusine                                     |
| Aconitum carmichaeli | crassicauline a                                |
| Aconitum carmichaeli | delgrandine                                    |
| Aconitum carmichaeli | deoxyaconitine                                 |
| Aconitum carmichaeli | delsemine a                                    |
| Aconitum carmichaeli | delsoline                                      |
| Aconitum carmichaeli | meta-aminophenol                               |
| Aconitum carmichaeli | uracil                                         |
| Aconitum carmichaeli | songrine                                       |
| Aconitum carmichaeli | delsemine b                                    |
| Aconitum carmichaeli | talatisamine                                   |
| Aconitum carmichaeli | deltoin                                        |
| Aconitum carmichaeli | dl-demetylcolarine                             |
| Aconitum carmichaeli | diacetylacoritine                              |
| Aconitum carmichaeli | talatizamine                                   |
| Aconitum carmichaeli | delvaconitine                                  |
| Aconitum carmichaeli | benzoylmesaconine                              |
| Aconitum carmichaeli | carosifloside i                                |
| Aconitum carmichaeli | carmichaeline                                  |
| Aconitum carmichaeli | lipodeoxyaconitine                             |
| Aconitum carmichaeli | p-aminophenol                                  |
| Aconitum carmichaeli | o-aminophenol                                  |
| Aconitum carmichaeli | deoxyandrographolide                           |
| Aconitum carmichaeli | benzoylhypaconine                              |
| Aconitum carmichaeli | isodephinine                                   |
| Aconitum carmichaeli | ortho-aminophenol                              |
| Aconitum carmichaeli | delphamine                                     |
| Aconitum carmichaeli | benzoylaconine                                 |
| Aconitum carmichaeli | neoline                                        |
| Aconitum carmichaeli | lipaconitine                                   |
| Aconitum carmichaeli | delamide                                       |
| Aconitum carmichaeli | 14-deoxy-11,12-didehydroandrographolide        |

|                      |                                  |
|----------------------|----------------------------------|
| Aconitum carmichaeli | triacetylaconine                 |
| Aconitum carmichaeli | hypaconine                       |
| Aconitum carmichaeli | delbruline                       |
| Aconitum carmichaeli | delbrunine                       |
| Ephedra sinica       | linolenic acid                   |
| Ephedra sinica       | camphor                          |
| Ephedra sinica       | pseudoginsenoside f11            |
| Ephedra sinica       | d-pseudoephedrine                |
| Ephedra sinica       | 4-isopropyl-benzaldehyde         |
| Ephedra sinica       | kaempferol-3-rhamnoside          |
| Ephedra sinica       | cuminyl alcohol                  |
| Ephedra sinica       | 2-methyl-2-butenal               |
| Ephedra sinica       | dibenzofuran                     |
| Ephedra sinica       | nonadecane                       |
| Ephedra sinica       | phenanthrene                     |
| Ephedra sinica       | gamma-terpinene                  |
| Ephedra sinica       | methyl-7-epiganoderate           |
| Ephedra sinica       | alpha-terpineol                  |
| Ephedra sinica       | isobutyl benzoate                |
| Ephedra sinica       | thymol                           |
| Ephedra sinica       | citronellol                      |
| Ephedra sinica       | methyl palmitate                 |
| Ephedra sinica       | heptadecane                      |
| Ephedra sinica       | tricin                           |
| Ephedra sinica       | pentadecanoic acid               |
| Ephedra sinica       | apigenin-5-rhamnoside            |
| Ephedra sinica       | alpha-teripineol                 |
| Ephedra sinica       | rhatannin                        |
| Ephedra sinica       | 3,4-dimethyl-5-phenyloxazolidine |
| Ephedra sinica       | tetracosane                      |
| Ephedra sinica       | 6-methyl-5-hepten-2-one          |
| Ephedra sinica       | kaempferol-7-rhamnoside          |
| Ephedra sinica       | octadecanoic acid                |
| Ephedra sinica       | hexahydrofarnesylacetone         |
| Ephedra sinica       | dimethyl phthalate               |
| Ephedra sinica       | acetophenone                     |
| Ephedra sinica       | leucodelphinidin                 |
| Ephedra sinica       | 2,4-decadienal                   |
| Ephedra sinica       | methyl acetate                   |
| Ephedra sinica       | o-methylptelefolonium            |
| Ephedra sinica       | d-n-methyl-pseudoephedrine       |
| Ephedra sinica       | kaempferol                       |
| Ephedra sinica       | 7-demethylsuberosin              |
| Ephedra sinica       | e,e-2,4-decadienal               |
| Ephedra sinica       | phenethyl caffeate               |
| Ephedra sinica       | (4s,5r)ephedroxane               |
| Ephedra sinica       | phytol                           |

|                |                                                            |
|----------------|------------------------------------------------------------|
| Ephedra sinica | (-)-epiafzelechin                                          |
| Ephedra sinica | norerythrostachaldine                                      |
| Ephedra sinica | norephedrine                                               |
| Ephedra sinica | glucoraphanin                                              |
| Ephedra sinica | p-cymene                                                   |
| Ephedra sinica | nonanoic acid                                              |
| Ephedra sinica | methyl furoate                                             |
| Ephedra sinica | myrcene                                                    |
| Ephedra sinica | maokonine                                                  |
| Ephedra sinica | maragenin ii                                               |
| Ephedra sinica | linalool                                                   |
| Ephedra sinica | o-benzoyl-1- (+) -pseudoephedrine                          |
| Ephedra sinica | 6-methyl-2-heptanone                                       |
| Ephedra sinica | hexanal                                                    |
| Ephedra sinica | beta-pinene                                                |
| Ephedra sinica | pseudoephedroxane                                          |
| Ephedra sinica | dibutyl phtalate                                           |
| Ephedra sinica | linoleic acid                                              |
| Ephedra sinica | 1-phenyl-1,2-propanedione                                  |
| Ephedra sinica | beta-cyclocitral                                           |
| Ephedra sinica | kaempferol rhamnoside                                      |
| Ephedra sinica | ephedine                                                   |
| Ephedra sinica | rose oxide                                                 |
| Ephedra sinica | alpha-linolenic acid                                       |
| Ephedra sinica | methyl benzoate                                            |
| Ephedra sinica | tetramethylpyrazine                                        |
| Ephedra sinica | p-isopropyl-benzaldehyde                                   |
| Ephedra sinica | n-methylephedrine                                          |
| Ephedra sinica | 3-o-β -d-glucopyranosyl-5,9,4'-trihydroxy-8-methoxyflavone |
| Ephedra sinica | beta-ionone                                                |
| Ephedra sinica | tetradecanoic acid                                         |
| Ephedra sinica | guaiazulene                                                |
| Ephedra sinica | trans-beta-terpineol                                       |
| Ephedra sinica | trans-2-nonenal                                            |
| Ephedra sinica | menthyl acetate                                            |
| Ephedra sinica | di-isobutyl phthalate                                      |
| Ephedra sinica | n-triacontanol                                             |
| Ephedra sinica | 16-triacontanol                                            |
| Ephedra sinica | nonanal                                                    |
| Ephedra sinica | 2-pentadecanone                                            |
| Ephedra sinica | dihydro-beta-ionone                                        |
| Ephedra sinica | naphthalene                                                |
| Ephedra sinica | decanoic acid                                              |
| Ephedra sinica | dimethyl naphthalene                                       |
| Ephedra sinica | 1,3,4-trimethyl-3-cyclohexene-1-carboxaldehyde             |
| Ephedra sinica | 1,1,3-trimethylcyclopentane                                |
| Ephedra sinica | ephedratannina, b                                          |



|                |                                                                                            |
|----------------|--------------------------------------------------------------------------------------------|
| Ephedra sinica | lauric acid                                                                                |
| Ephedra sinica | tricosane                                                                                  |
| Ephedra sinica | 2,3,4-trimethyl-5-phenyloxazolidine                                                        |
| Ephedra sinica | alpha-pinene                                                                               |
| Ephedra sinica | piperitone                                                                                 |
| Ephedra sinica | methylphedrine                                                                             |
| Ephedra sinica | 4,5',8-trimethyl psoralen                                                                  |
| Ephedra sinica | chuanxiongzine                                                                             |
| Ephedra sinica | styrene                                                                                    |
| Ephedra sinica | 1,5-dimethyl-naphthalene                                                                   |
| Ephedra sinica | o-xylene                                                                                   |
| Ephedra sinica | leucopelargonidin                                                                          |
| Ephedra sinica | 1,8-cineole                                                                                |
| Ephedra sinica | 1,4-cineole                                                                                |
| Ephedra sinica | safranal                                                                                   |
| Ephedra sinica | hexadecanoic acid                                                                          |
| Ephedra sinica | pseudoephedrine                                                                            |
| Ephedra sinica | nor-rubrofusarin                                                                           |
| Ephedra sinica | cis-p-2-menthen-1-ol                                                                       |
| Ephedra sinica | delta-terpineol                                                                            |
| Ephedra sinica | norpseudoephedrine                                                                         |
| Ephedra sinica | beta-eudesmol                                                                              |
| Ephedra sinica | myricadiol                                                                                 |
| Ephedra sinica | sabinene                                                                                   |
| Ephedra sinica | cibarian                                                                                   |
| Ephedra sinica | (4s,5r) ephedroxane                                                                        |
| Ephedra sinica | ephedrine                                                                                  |
| Ephedra sinica | d-norpseudoephedrine                                                                       |
| Ephedra sinica | lauric acid                                                                                |
| Ephedra sinica | limonene                                                                                   |
| Ephedra sinica | 1-octanol                                                                                  |
| Ephedra sinica | phenethylamine                                                                             |
| Ephedra sinica | nerolidol                                                                                  |
| Ephedra sinica | herbacetin-3-beta-d-(2-o-beta-d-glucopyra-nosidogluco-pyranoside)-8-beta-d-glucopyranoside |
| Ephedra sinica | carvacrol                                                                                  |
| Ephedra sinica | kaempferol-3-arabofuranoside                                                               |
| Ephedra sinica | 3-methyl phenanthrene                                                                      |
| Ephedra sinica | benzaldehyde                                                                               |
| Ephedra sinica | xylene                                                                                     |
| Ephedra sinica | 1-octen-3-ol                                                                               |
| Ephedra sinica | methylpseudoephedrine                                                                      |
| Ephedra sinica | herbacetin                                                                                 |
| Ephedra sinica | alpha-terpinolene                                                                          |
| Ephedra sinica | vanillic acid                                                                              |
| Ephedra sinica | octanoic acid                                                                              |
| Ephedra sinica | m-xylene                                                                                   |

|                     |                                                                                             |
|---------------------|---------------------------------------------------------------------------------------------|
| Ephedra sinica      | 3-methoxyherbacetin                                                                         |
| Ephedra sinica      | 11-methoxyhumantenine                                                                       |
| Ephedra sinica      | heneicosane                                                                                 |
| Ephedra sinica      | hexanoic acid                                                                               |
| Ephedra sinica      | ethanol                                                                                     |
| Ephedra sinica      | 2,3,5,6-tetramethyl-pyrazine                                                                |
| Ephedra sinica      | geraniol                                                                                    |
| Ephedra sinica      | octadecane                                                                                  |
| Ephedra sinica      | linalool oxide                                                                              |
| Ephedra sinica      | heptanoic acid                                                                              |
| Ephedra sinica      | methylacetophenone                                                                          |
| Ephedra sinica      | alpha-ionone                                                                                |
| Ephedra sinica      | ephedroxane                                                                                 |
| Ephedra sinica      | cis- $\beta$ -terpineol                                                                     |
| Ephedra sinica      | terpinen-4-ol                                                                               |
| Ephedra sinica      | apigenin                                                                                    |
| Ephedra sinica      | hexanol                                                                                     |
| Ephedra sinica      | octanol                                                                                     |
| Ephedra sinica      | $\alpha$ -terpineol                                                                         |
| Ephedra sinica      | trans- $\beta$ -terpineol                                                                   |
| Zingiber officinale | (3r,5s)-3-acetoxy-5-hydroxy-1,7-bis(4-hydroxy-3-methoxyphenyl)heptane                       |
| Zingiber officinale | $\alpha$ -cubebene                                                                          |
| Zingiber officinale | [6]-gingerdione (enol form)                                                                 |
| Zingiber officinale | [10]-gingediol                                                                              |
| Zingiber officinale | [8]-gingediol                                                                               |
| Zingiber officinale | [6]-gingediol                                                                               |
| Zingiber officinale | [6]-gingediacetate                                                                          |
| Zingiber officinale | camphor                                                                                     |
| Zingiber officinale | 1-(4-hydroxy-3-methoxyphenyl)propan-1,2-diol                                                |
| Zingiber officinale | d-limonene                                                                                  |
| Zingiber officinale | (5s)-5-acetoxy-1,7-bis(4-hydroxy-3-methoxy-phenyl)heptan-3-one                              |
| Zingiber officinale | 1,5-epoxy-3-hydroxy-1-(4-hydroxy-3,5-dimethoxyphenyl)-7-(4-hydroxy-3-methoxy-phenyl)heptane |
| Zingiber officinale | camphene                                                                                    |
| Zingiber officinale | difengpin                                                                                   |
| Zingiber officinale | $\alpha$ -copaene                                                                           |
| Zingiber officinale | $\alpha$ -curcumene                                                                         |
| Zingiber officinale | zingiberol                                                                                  |
| Zingiber officinale | ethylisopropyl sulfide                                                                      |
| Zingiber officinale | 5-hydroxy-1-(4-hydroxy-3-methoxyphenyl)-7-(3,4-dihydroxyphenyl)heptan-3-one                 |
| Zingiber officinale | 5-hydroxy-1-(4-hydroxy-3-methoxyphenyl)-7-(3,4-dihydroxy-5-methoxyphenyl)heptan-3-one       |
| Zingiber officinale | isobrucine                                                                                  |
| Zingiber officinale | (e)-2-nonenal                                                                               |
| Zingiber officinale | gingerenone a                                                                               |
| Zingiber officinale | $\gamma$ -terpinene                                                                         |
| Zingiber officinale | eudesobovatol a                                                                             |

|                     |                                                                                              |
|---------------------|----------------------------------------------------------------------------------------------|
| Zingiber officinale | beta-eudesmol                                                                                |
| Zingiber officinale | (3r,5s)-3,5-dihydroxy-1-(4-hydroxy-3,5-dimethoxyphenyl)-7-(4-hydroxy-3-methoxyphenyl)heptane |
| Zingiber officinale | fenchyl alcohol                                                                              |
| Zingiber officinale | (+)-car-3-ene-2,5-dione                                                                      |
| Zingiber officinale | fenfangine a                                                                                 |
| Zingiber officinale | citral                                                                                       |
| Zingiber officinale | (e)-citral                                                                                   |
| Zingiber officinale | (z)-citral                                                                                   |
| Zingiber officinale | methylacetate                                                                                |
| Zingiber officinale | 9-ethoxy-aristolactam                                                                        |
| Zingiber officinale | 4-ethenyl-2,2,4-trimethyl-3-(1-methylethenyl)-cyclohexane-methanol                           |
| Zingiber officinale | citronellol                                                                                  |
| Zingiber officinale | citronellyl acetate                                                                          |
| Zingiber officinale | 6-hydroxy-2-[2-(4'-methoxyphenyl)-ethyl] chromone                                            |
| Zingiber officinale | methyl ally tetraslfide                                                                      |
| Zingiber officinale | coprine                                                                                      |
| Zingiber officinale | alpha-bergamotene                                                                            |
| Zingiber officinale | propionaldehyde                                                                              |
| Zingiber officinale | cubebin                                                                                      |
| Zingiber officinale | 1-(4-hydroxy-3-methoxyphenyl)-3,5-octane-diol                                                |
| Zingiber officinale | 4,8,12-trimethyl tridecanoic acid                                                            |
| Zingiber officinale | borneol                                                                                      |
| Zingiber officinale | methyl guaia-1(10),11-dien-15-carboxylate                                                    |
| Zingiber officinale | d-alpha-pipecoline                                                                           |
| Zingiber officinale | $\Delta$ 3-menthene                                                                          |
| Zingiber officinale | $\beta$ -caryophyllene                                                                       |
| Zingiber officinale | $\Delta$ 1(7)-menthene                                                                       |
| Zingiber officinale | eugenol methyl ether                                                                         |
| Zingiber officinale | $\beta$ -farnesene                                                                           |
| Zingiber officinale | $\beta$ -bisabolene                                                                          |
| Zingiber officinale | $\alpha$ -pinene                                                                             |
| Zingiber officinale | 3,5-diacetoxy-1-(4-hydroxy-3,5-dimethoxy-phenyl)-7-(4-hydroxy-3-methoxyphenyl)heptane        |
| Zingiber officinale | p-menth-2-en-7-ol                                                                            |
| Zingiber officinale | citropten                                                                                    |
| Zingiber officinale | methylglyoxal                                                                                |
| Zingiber officinale | 6-methylgingediol                                                                            |
| Zingiber officinale | 6-methylgingediacetate                                                                       |
| Zingiber officinale | $\beta$ -cis-ocimene                                                                         |
| Zingiber officinale | 8-geranyloxy psoralen                                                                        |
| Zingiber officinale | octanoic acid                                                                                |
| Zingiber officinale | 6-acetyl gingerol                                                                            |
| Zingiber officinale | 1-(4-hydroxy-3-methoxyphenyl)-3,5-diacetoxy-octane                                           |
| Zingiber officinale | 4-methyl-1-(1-methylethyl)-3-cyclohexen-1-ol-acetate                                         |
| Zingiber officinale | tricyclodehydroisohumulone                                                                   |
| Zingiber officinale | pipecolicacid                                                                                |

|                     |                                       |
|---------------------|---------------------------------------|
| Zingiber officinale | (z,z)- $\alpha$ -farnesene            |
| Zingiber officinale | n-butylaldehyde                       |
| Zingiber officinale | shogasulfonicacid d                   |
| Zingiber officinale | farnesiferol a                        |
| Zingiber officinale | eugenone                              |
| Zingiber officinale | diethyl sulfide                       |
| Zingiber officinale | n-butyl allophanate                   |
| Zingiber officinale | $\alpha$ -bergamotene                 |
| Zingiber officinale | delta-elemene                         |
| Zingiber officinale | farnesol                              |
| Zingiber officinale | zonarene                              |
| Zingiber officinale | nonanoic acid                         |
| Zingiber officinale | campherenol                           |
| Zingiber officinale | terpinolene                           |
| Zingiber officinale | terpinyl acetate                      |
| Zingiber officinale | farnesyl acetate                      |
| Zingiber officinale | 2-methyl-5-acetonyl-7-hydroxychromone |
| Zingiber officinale | beta-curcumene                        |
| Zingiber officinale | nerol                                 |
| Zingiber officinale | 2-nonanone                            |
| Zingiber officinale | nerelistoxin                          |
| Zingiber officinale | delta7-menthene                       |
| Zingiber officinale | ethylaurate                           |
| Zingiber officinale | methyl allyl sulfide                  |
| Zingiber officinale | p-cymene                              |
| Zingiber officinale | caranine                              |
| Zingiber officinale | 3-caraneol                            |
| Zingiber officinale | 2-caraneol                            |
| Zingiber officinale | hptaphylline                          |
| Zingiber officinale | linalool                              |
| Zingiber officinale | gingerdione                           |
| Zingiber officinale | beta-pinene                           |
| Zingiber officinale | cis-methyl isoeugenol                 |
| Zingiber officinale | methyl isobutyl ketone                |
| Zingiber officinale | zingerone                             |
| Zingiber officinale | zingiberene                           |
| Zingiber officinale | 10-gingerol                           |
| Zingiber officinale | 4'-o-methylglabridin                  |
| Zingiber officinale | geraniin                              |
| Zingiber officinale | nonane                                |
| Zingiber officinale | gingerol                              |
| Zingiber officinale | acetylborneol                         |
| Zingiber officinale | paravallarine                         |
| Zingiber officinale | 1-thujone                             |
| Zingiber officinale | thujene                               |
| Zingiber officinale | phellatin                             |
| Zingiber officinale | $\beta$ -phellandrene                 |

|                     |                                                                                       |
|---------------------|---------------------------------------------------------------------------------------|
| Zingiber officinale | propionic acid                                                                        |
| Zingiber officinale | 4-gingerol                                                                            |
| Zingiber officinale | $\beta$ -santalol                                                                     |
| Zingiber officinale | santamarin                                                                            |
| Zingiber officinale | cinerins                                                                              |
| Zingiber officinale | isovaleraldehyde                                                                      |
| Zingiber officinale | heptane                                                                               |
| Zingiber officinale | ethyl acetate                                                                         |
| Zingiber officinale | zygacine                                                                              |
| Zingiber officinale | ethyl aldehyde                                                                        |
| Zingiber officinale | 2-heptanol                                                                            |
| Zingiber officinale | isovaleric acid                                                                       |
| Zingiber officinale | 10-gingediol                                                                          |
| Zingiber officinale | nervogenic acid                                                                       |
| Zingiber officinale | 8-gingediol                                                                           |
| Zingiber officinale | 6-gingediol                                                                           |
| Zingiber officinale | 1,3,3-trimethyltricyclo[2.2.1.0(2,6)]heptane                                          |
| Zingiber officinale | 6-paradol                                                                             |
| Zingiber officinale | 5-hydroxy-1-(3,4-dihydroxy-5-methoxyphenyl)-7-(4-hydroxy-3-methoxyphenyl)heptan-3-one |
| Zingiber officinale | 12,13-di-acetoxyl-1,4,6,11-eudesmanetetol                                             |
| Zingiber officinale | citraurin beta                                                                        |
| Zingiber officinale | 1-(1,5-dimethyl-4-hexenyl)-4-methyl benzene                                           |
| Zingiber officinale | 1,8-cineole                                                                           |
| Zingiber officinale | safrole                                                                               |
| Zingiber officinale | safynol                                                                               |
| Zingiber officinale | cis-beta-terpineol                                                                    |
| Zingiber officinale | (e)-8 $\beta$ ,17-epoxylabd-12-ene-15,16-dial                                         |
| Zingiber officinale | shogasulfonicacid b                                                                   |
| Zingiber officinale | 2,5-dimethyl-7-hydroxy chromone                                                       |
| Zingiber officinale | delta-terpineol                                                                       |
| Zingiber officinale | e-nerolidol                                                                           |
| Zingiber officinale | z-nerolidol                                                                           |
| Zingiber officinale | isoginkgetin                                                                          |
| Zingiber officinale | beta-bisabolene                                                                       |
| Zingiber officinale | isogingerenone b                                                                      |
| Zingiber officinale | alpha-limonene                                                                        |
| Zingiber officinale | i-linalool                                                                            |
| Zingiber officinale | meso-3,5-diacetoxy-1,7-bis-(4-hydroxy-3-methoxyphenyl)heptane                         |
| Zingiber officinale | mesotrihydroxypiperidine                                                              |
| Zingiber officinale | alloaromadendrene                                                                     |
| Zingiber officinale | terinen-4-ol                                                                          |
| Zingiber officinale | elemol                                                                                |
| Zingiber officinale | shyobunone                                                                            |
| Zingiber officinale | shogasulfonicacid a                                                                   |
| Zingiber officinale | shogasulfonicacid c                                                                   |
| Zingiber officinale | $\gamma$ -elemene                                                                     |

|                     |                                                                                                 |
|---------------------|-------------------------------------------------------------------------------------------------|
| Zingiber officinale | $\beta$ -elemene                                                                                |
| Zingiber officinale | 6-shogaol                                                                                       |
| Zingiber officinale | 6-gingerol                                                                                      |
| Zingiber officinale | elenolide                                                                                       |
| Zingiber officinale | n-propanol                                                                                      |
| Zingiber officinale | shogaol                                                                                         |
| Zingiber officinale | dehydroglaucine                                                                                 |
| Zingiber officinale | 10-dehydrogingerdione                                                                           |
| Zingiber officinale | 6-dehydrogingerdione                                                                            |
| Zingiber officinale | alpha-fenchene                                                                                  |
| Zingiber officinale | propapyriogenin a2                                                                              |
| Zingiber officinale | alpha-farnesene                                                                                 |
| Zingiber officinale | methyl-4- o-methylgallate                                                                       |
| Zingiber officinale | (+)-1,5-epoxy-nor-ketoguaia-11-ene                                                              |
| Zingiber officinale | glyoxal                                                                                         |
| Zingiber officinale | alpha-cedrene                                                                                   |
| Zingiber officinale | cyanuricoside a                                                                                 |
| Zingiber officinale | octanal                                                                                         |
| Zingiber officinale | gamma-camphorene                                                                                |
| Zingiber officinale | afromodial                                                                                      |
| Zingiber officinale | 1-(4-hydroxy-3-methoxyphenyl)-2-[4-(omega-hydroxypropyl)-2-methoxyphenoxy]<br>-propane-1,3-diol |
| Zingiber officinale | tricyclene                                                                                      |
| Zingiber officinale | ethylpropionate                                                                                 |
| Zingiber officinale | methyl hexadecanate                                                                             |
| Zingiber officinale | 4-ethylresorcinol                                                                               |
| Zingiber officinale | n-nonane                                                                                        |
| Zingiber officinale | 2-nonanol                                                                                       |
| Zingiber officinale | n-nonanol                                                                                       |
| Zingiber officinale | 4-gingesulfonicacid                                                                             |
| Zingiber officinale | 6-gingesulfonicacid                                                                             |
| Zingiber officinale | glypallichalcone                                                                                |
| Zingiber officinale | [6]-gingerol                                                                                    |
| Zingiber officinale | zingiberone                                                                                     |
| Zingiber officinale | gingerenone b                                                                                   |
| Zingiber officinale | gingerenone c                                                                                   |
| Zingiber officinale | (3s,5s)-3,5-diacetoxy-1,7-bis(4-hydroxy-3-methoxyphenyl)heptane                                 |
| Zingiber officinale | [4]-gingerol                                                                                    |
| Zingiber officinale | elemicin                                                                                        |
| Zingiber officinale | $\beta$ -cedrene                                                                                |
| Zingiber officinale | geraniol                                                                                        |
| Zingiber officinale | geranyl acetate                                                                                 |
| Zingiber officinale | bata-caryophyllene                                                                              |
| Zingiber officinale | galanolactone                                                                                   |
| Zingiber officinale | galanthamine                                                                                    |
| Zingiber officinale | d-isoborneol                                                                                    |
| Zingiber officinale | l-isoborneol                                                                                    |

|                           |                                                                                             |
|---------------------------|---------------------------------------------------------------------------------------------|
| Zingiber officinale       | perilla ketone                                                                              |
| Zingiber officinale       | perilal                                                                                     |
| Zingiber officinale       | terpinen-4-ol                                                                               |
| Zingiber officinale       | carene-3                                                                                    |
| Zingiber officinale       | n-octane                                                                                    |
| Zingiber officinale       | $\beta$ -fenchene                                                                           |
| Zingiber officinale       | $\alpha$ -terpineol                                                                         |
| Atractylodes macrocephala | butenolide b                                                                                |
| Atractylodes macrocephala | beta-eudesmol                                                                               |
| Atractylodes macrocephala | 12(alpha-methyl butyryl)-14-acetyl-2e,8z,10e-atractylentriol                                |
| Atractylodes macrocephala | 14(alpha-methyl butyryl)-2e,8e,10e-atractylentriol                                          |
| Atractylodes macrocephala | 14(alpha-methyl butyryl)-2e,8z,10e-atractylentriol                                          |
| Atractylodes macrocephala | 2alpha-(alpha-methylbutyryl)-oxy-5alpha,7beta,9alpha,10beta-tetraacetoxy-4(20),11-taxadiene |
| Atractylodes macrocephala | atractylentrid                                                                              |
| Atractylodes macrocephala | atractyenolide                                                                              |
| Atractylodes macrocephala | atractylentriol                                                                             |
| Atractylodes macrocephala | atractylodin                                                                                |
| Atractylodes macrocephala | atractylenolide i                                                                           |
| Atractylodes macrocephala | atractylenolide iii                                                                         |
| Atractylodes macrocephala | (+)-eudesma-4(15),7(11)-dien-8-one                                                          |
| Atractylodes macrocephala | butenolide a                                                                                |
| Atractylodes macrocephala | 4-ethoxycarbonyl-2-quinolone                                                                |
| Atractylodes macrocephala | hinesol                                                                                     |
| Atractylodes macrocephala | 8 $\beta$ -ethoxy atractylenolide iii                                                       |
| Atractylodes macrocephala | atractylenolide                                                                             |
| Atractylodes macrocephala | atractylon                                                                                  |
| Atractylodes macrocephala | 12(alpha-methyl butyryl)-14-acetyl-2e,8z,10e-atractylentriol                                |
| Atractylodes macrocephala | 12-( $\alpha$ -methyl butyryl)-14-acetyl-2 e,8 e,10 e-atractylentriol                       |
| Atractylodes macrocephala | atractylone                                                                                 |
| Atractylodes macrocephala | juniper camphor                                                                             |
| Atractylodes macrocephala | jurubine                                                                                    |
| Saposhnikovia divaricata  | 1-hexanol                                                                                   |
| Saposhnikovia divaricata  | 3'(s)-(-)-hamaudol                                                                          |
| Saposhnikovia divaricata  | hancinol                                                                                    |
| Saposhnikovia divaricata  | cuparene                                                                                    |
| Saposhnikovia divaricata  | 3-methyl-3-butenone                                                                         |
| Saposhnikovia divaricata  | deltoin                                                                                     |
| Saposhnikovia divaricata  | panaxytriol                                                                                 |
| Saposhnikovia divaricata  | suffruticoside a                                                                            |
| Saposhnikovia divaricata  | phenethyl alcohol                                                                           |
| Saposhnikovia divaricata  | n-octane                                                                                    |
| Saposhnikovia divaricata  | phellopterin                                                                                |
| Saposhnikovia divaricata  | 4'-o- $\beta$ -glucopyranosyl-5-o-methylvisamminol                                          |
| Saposhnikovia divaricata  | panaxydol                                                                                   |
| Saposhnikovia divaricata  | deltonin (e)                                                                                |
| Saposhnikovia divaricata  | prim-o-glucosylcimifugin                                                                    |

|                          |                                                                              |
|--------------------------|------------------------------------------------------------------------------|
| Saposhnikovia divaricata | alpha-cuparenol                                                              |
| Saposhnikovia divaricata | cimicifugoside                                                               |
| Saposhnikovia divaricata | bergapten                                                                    |
| Saposhnikovia divaricata | fallacinol                                                                   |
| Saposhnikovia divaricata | psoralen                                                                     |
| Saposhnikovia divaricata | dacursin                                                                     |
| Saposhnikovia divaricata | tetradecane                                                                  |
| Saposhnikovia divaricata | daucosterol                                                                  |
| Saposhnikovia divaricata | imperatorin                                                                  |
| Saposhnikovia divaricata | naphthazarin                                                                 |
| Saposhnikovia divaricata | naphthalene                                                                  |
| Saposhnikovia divaricata | pentanal                                                                     |
| Saposhnikovia divaricata | 3'-o-acetylhamaudol                                                          |
| Saposhnikovia divaricata | eudesobovatol                                                                |
| Saposhnikovia divaricata | (3's)-hydroxydeltoin                                                         |
| Saposhnikovia divaricata | octanal                                                                      |
| Saposhnikovia divaricata | beta-eudesmol                                                                |
| Saposhnikovia divaricata | 3'-o-angeloylhamaudol                                                        |
| Saposhnikovia divaricata | 5-o-methylvisamminol                                                         |
| Saposhnikovia divaricata | lignocericacid                                                               |
| Saposhnikovia divaricata | gamma-sitosterol                                                             |
| Saposhnikovia divaricata | ledebouriello                                                                |
| Saposhnikovia divaricata | 2-(beta-d-glucopyranosyloxy)-8-hydroxy-1-methoxy-3-methyl-9,10-anthraquinone |
| Saposhnikovia divaricata | $\alpha$ -pinene                                                             |
| Saposhnikovia divaricata | 2-o-methyl-d-xylose                                                          |
| Saposhnikovia divaricata | 1,8-heptadecadiene-4,6-diyne-3,10-diol                                       |
| Saposhnikovia divaricata | heptadecane                                                                  |
| Saposhnikovia divaricata | heptadeca-1-en-4,6-diyne-3,9-diol                                            |
| Saposhnikovia divaricata | lignoceric acid                                                              |
| Saposhnikovia divaricata | primetin                                                                     |
| Saposhnikovia divaricata | 2-methylbut-3-en-2-ol                                                        |
| Saposhnikovia divaricata | pentanic acid                                                                |
| Saposhnikovia divaricata | sucrose                                                                      |
| Saposhnikovia divaricata | divaricatol                                                                  |
| Saposhnikovia divaricata | $\beta$ -sitosterol                                                          |
| Saposhnikovia divaricata | beta-pinene                                                                  |
| Saposhnikovia divaricata | chromone                                                                     |
| Saposhnikovia divaricata | cis-falcarindiol                                                             |
| Saposhnikovia divaricata | pentanol                                                                     |
| Saposhnikovia divaricata | dauricine                                                                    |
| Saposhnikovia divaricata | 1-octen-3-ol                                                                 |
| Saposhnikovia divaricata | 4-pentenyl isothiocyanate                                                    |
| Saposhnikovia divaricata | 3-o-angeloyl-hamaudol                                                        |
| Saposhnikovia divaricata | panaxynol                                                                    |
| Saposhnikovia divaricata | beta-bisabolene                                                              |
| Saposhnikovia divaricata | (e)-2-hexenal                                                                |



|                          |                                                                                |
|--------------------------|--------------------------------------------------------------------------------|
| Saposhnikovia divaricata | ledol                                                                          |
| Saposhnikovia divaricata | imperialine                                                                    |
| Saposhnikovia divaricata | prim-o-glucosylcimifogin                                                       |
| Saposhnikovia divaricata | $\beta$ -bisabolene                                                            |
| Saposhnikovia divaricata | hexanal                                                                        |
| Saposhnikovia divaricata | hexanol                                                                        |
| Saposhnikovia divaricata | octanol                                                                        |
| Saposhnikovia divaricata | 3-octanol                                                                      |
| Saposhnikovia divaricata | 7-octen-4-ol                                                                   |
| Saposhnikovia divaricata | heptadeca-1-en-4,6-dihy-3,9-diol                                               |
| Cinnamomum cassia        | cinnamaldehyde                                                                 |
| Cinnamomum cassia        | anhydrocinnzeylanine                                                           |
| Cinnamomum cassia        | beta-sitosterol                                                                |
| Cinnamomum cassia        | 2-methoxycinnamaldehyde                                                        |
| Cinnamomum cassia        | cinnamic acid                                                                  |
| Cinnamomum cassia        | camphor                                                                        |
| Cinnamomum cassia        | tetradecanal                                                                   |
| Cinnamomum cassia        | dihydromelilotoside                                                            |
| Cinnamomum cassia        | protocatechuic acid                                                            |
| Cinnamomum cassia        | 3,4-dihydroxybenzoic acid                                                      |
| Cinnamomum cassia        | nerolidol                                                                      |
| Cinnamomum cassia        | protocatechuic acid-3-glucoside                                                |
| Cinnamomum cassia        | (+/-)-2,3-dihydro-2-(1-methylethenyl)-5-benzofurancarboxylic acid methyl ester |
| Cinnamomum cassia        | melilotocarpan a                                                               |
| Cinnamomum cassia        | procurcumenol                                                                  |
| Cinnamomum cassia        | melilotic acid                                                                 |
| Cinnamomum cassia        | benzaldehyde                                                                   |
| Cinnamomum cassia        | coumarin                                                                       |
| Cinnamomum cassia        | cinnamyl alcohol                                                               |
| Cinnamomum cassia        | 5-cinnamoyl-9-o-acetylprototaxicin i                                           |
| Cinnamomum cassia        | trans-cinnamic acid                                                            |
| Cinnamomum cassia        | cinnamic aldehyde                                                              |
| Cinnamomum cassia        | gamma-sitosterol                                                               |
| Cinnamomum cassia        | farnesol                                                                       |
| Cinnamomum cassia        | 3-o-p-hydroxy-trans-cinnamoylmaslinic acid                                     |
| Cinnamomum cassia        | coumarinic acid                                                                |
| Cinnamomum cassia        | styrene                                                                        |
| Cinnamomum cassia        | $\beta$ -sitosterol                                                            |
| Cinnamomum cassia        | 2'-hydroxycinnamaldehyde                                                       |
| Cinnamomum cassia        | anhydrocinnzeylanol                                                            |
| Cinnamomum cassia        | proanthocyanidin b2                                                            |
| Cinnamomum cassia        | anethole                                                                       |
| Cinnamomum cassia        | 3-(4-hydroxyphenyl)-trans-propenoic acid-2,3-dihydroxypropyl ester             |
| Cinnamomum cassia        | acetic acid                                                                    |
| Paeonia albiflora        | paeonol                                                                        |
| Paeonia albiflora        | 1,2,3-tri-o-galloyl- $\beta$ -d-glucose                                        |
| Paeonia albiflora        | 1,2,6-tri-o-galloyl- $\beta$ -d-glucose                                        |

|                   |                                                 |
|-------------------|-------------------------------------------------|
| Paeonia albiflora | 1,3,6-trigalloyl- $\beta$ -d-glucose            |
| Paeonia albiflora | d-catechin                                      |
| Paeonia albiflora | paeonianin a                                    |
| Paeonia albiflora | paeonianiin e                                   |
| Paeonia albiflora | palbinone                                       |
| Paeonia albiflora | 1,2,3,4,6-pentagalloylglucose                   |
| Paeonia albiflora | catechin                                        |
| Paeonia albiflora | (+)-catechin                                    |
| Paeonia albiflora | 4-o-galloyl quinicacid                          |
| Paeonia albiflora | 3-o-galloyl quinicacid                          |
| Paeonia albiflora | pyrethrin ii                                    |
| Paeonia albiflora | benzoic acid                                    |
| Paeonia albiflora | albiflorin                                      |
| Paeonia albiflora | casuariin                                       |
| Paeonia albiflora | benzoicacid                                     |
| Paeonia albiflora | epigallocatechin                                |
| Paeonia albiflora | 13-methyl tetradecanoicacid                     |
| Paeonia albiflora | eugenin                                         |
| Paeonia albiflora | gallotannin                                     |
| Paeonia albiflora | pyrethrin i                                     |
| Paeonia albiflora | beta-sitosterol                                 |
| Paeonia albiflora | 1, 2, 3, 4, 6-pentagalloylglucose               |
| Paeonia albiflora | casuarictin                                     |
| Paeonia albiflora | benzoylpaeoniflorin                             |
| Paeonia albiflora | (-)-catechin                                    |
| Paeonia albiflora | pedunculagin                                    |
| Paeonia albiflora | 1-o-galloyl- glucose                            |
| Paeonia albiflora | paeoniflorigenone                               |
| Paeonia albiflora | tellimagrandin i                                |
| Paeonia albiflora | 1,2,3,6-tetra-o-galloyl- $\beta$ -d-glucose     |
| Paeonia albiflora | paeonianin b                                    |
| Paeonia albiflora | paeonianin c                                    |
| Paeonia albiflora | paeonianin d                                    |
| Paeonia albiflora | 2,3-o-(s)-hexahydroxydiphenoyl-d-gluco-pyranose |
| Paeonia albiflora | paeoniflorin                                    |
| Paeonia albiflora | paeonilactone a                                 |
| Paeonia albiflora | paeonilactone b                                 |
| Paeonia albiflora | paeonilactone c                                 |
| Paeonia albiflora | (z)-(1s,5r)-beta-pinen-1-oxy-beta-vicianoside   |
| Paeonia albiflora | gallicacid                                      |
| Paeonia albiflora | phenol                                          |
| Paeonia albiflora | $\beta$ -sitosterol                             |
| Paeonia albiflora | gallocatechin                                   |
| Paeonia albiflora | oxypaeoniflorin                                 |
| Paeonia albiflora | 5-desgalloylstachyurin                          |
| Paeonia albiflora | albiflorinr1                                    |
| Paeonia albiflora | paeonin                                         |

|                           |                                                                                                                                              |
|---------------------------|----------------------------------------------------------------------------------------------------------------------------------------------|
| Paeonia albiflora         | lactiflorin                                                                                                                                  |
| Paeonia albiflora         | peonin                                                                                                                                       |
| Paeonia albiflora         | strictinin                                                                                                                                   |
| Paeonia albiflora         | acetic acid                                                                                                                                  |
| Anemarrhena asphodeloides | sarsasapogenin                                                                                                                               |
| Anemarrhena asphodeloides | monomethyl-cis-hinokiresinol                                                                                                                 |
| Anemarrhena asphodeloides | monomethyl lithospermate                                                                                                                     |
| Anemarrhena asphodeloides | chrysanthemaxanthin                                                                                                                          |
| Anemarrhena asphodeloides | timosaponin a- i, a- ii, a- iii, a- iv, b- i & b- ii                                                                                         |
| Anemarrhena asphodeloides | neogitogenin                                                                                                                                 |
| Anemarrhena asphodeloides | macrostemonoside f                                                                                                                           |
| Anemarrhena asphodeloides | smilagenin-3-o-[ $\beta$ -d-glucopyranosyl-(1 $\rightarrow$ 2)]- $\beta$ -d-mannopyranoside                                                  |
| Anemarrhena asphodeloides | timosaponin a1                                                                                                                               |
| Anemarrhena asphodeloides | timosaponin a3                                                                                                                               |
| Anemarrhena asphodeloides | isomangiferin                                                                                                                                |
| Anemarrhena asphodeloides | ginkgetin                                                                                                                                    |
| Anemarrhena asphodeloides | 4-o-beta-d-glucopyranosyl methyl gallate                                                                                                     |
| Anemarrhena asphodeloides | timosaponin a-iii                                                                                                                            |
| Anemarrhena asphodeloides | anemarrhenasaponin-ia                                                                                                                        |
| Anemarrhena asphodeloides | timobiose                                                                                                                                    |
| Anemarrhena asphodeloides | nicotinamide                                                                                                                                 |
| Anemarrhena asphodeloides | mangiferolic acid                                                                                                                            |
| Anemarrhena asphodeloides | (25r,s)-5alpha-spirostane-2alpha,3beta-diol<br>3-o-[o-beta-d-glucopyranosyl-(1-2)-o-beta-d-glucopyranosyl-(1-4)-beta-d-galactopyranoside]    |
| Anemarrhena asphodeloides | desglucolanatigonin ii                                                                                                                       |
| Anemarrhena asphodeloides | (5 $\beta$ ,25s)-spirostan-3 $\beta$ ,15 $\alpha$ ,23 $\alpha$ -diol-3-o-d-glu-copyranosyl-(1 $\rightarrow$ 2)- $\beta$ -d-galactopyranoside |
| Anemarrhena asphodeloides | markogenin- 3-o-beta-d-glucopyranosyl-(1-2)-beta-d-galactopyranoside                                                                         |
| Anemarrhena asphodeloides | markogenin                                                                                                                                   |
| Anemarrhena asphodeloides | markogenin3-o- $\beta$ -d-glucopyranosyl-(1 $\rightarrow$ 2)- $\beta$ -d-galactopyranoside                                                   |
| Anemarrhena asphodeloides | ginkgolic acid                                                                                                                               |
| Anemarrhena asphodeloides | anemarrhenasaponin-i                                                                                                                         |
| Anemarrhena asphodeloides | degalactotigonin                                                                                                                             |
| Anemarrhena asphodeloides | nicotine                                                                                                                                     |
| Anemarrhena asphodeloides | anemarans a, b, c, d                                                                                                                         |
| Anemarrhena asphodeloides | hippeastrine                                                                                                                                 |
| Anemarrhena asphodeloides | cis-hinokiresinol                                                                                                                            |
| Anemarrhena asphodeloides | isomangiferolic acid                                                                                                                         |
| Anemarrhena asphodeloides | anemarsaponin g                                                                                                                              |
| Anemarrhena asphodeloides | anemarsaponin f                                                                                                                              |
| Anemarrhena asphodeloides | anemarsaponin e                                                                                                                              |
| Anemarrhena asphodeloides | anemarsaponin c                                                                                                                              |
| Anemarrhena asphodeloides | anemarsaponin b                                                                                                                              |
| Anemarrhena asphodeloides | anemarrhenasaponin ia                                                                                                                        |
| Anemarrhena asphodeloides | anemarrhenasaponin i                                                                                                                         |
| Anemarrhena asphodeloides | sarsasapogenin 3-o-4-rhamnosyl-sophoroside                                                                                                   |

|                           |                                                                                                                                                                              |
|---------------------------|------------------------------------------------------------------------------------------------------------------------------------------------------------------------------|
| Anemarrhena asphodeloides | choline                                                                                                                                                                      |
| Anemarrhena asphodeloides | tingenone                                                                                                                                                                    |
| Anemarrhena asphodeloides | sarsasapogenin-3-o-beta-d-glucopyranosyl(1->2)-beta-galactopyranoside                                                                                                        |
| Anemarrhena asphodeloides | smilagenone                                                                                                                                                                  |
| Anemarrhena asphodeloides | xilingsaponin b                                                                                                                                                              |
| Anemarrhena asphodeloides | mangiferin                                                                                                                                                                   |
| Anemarrhena asphodeloides | neoglucobrassicin                                                                                                                                                            |
| Anemarrhena asphodeloides | 12-o-nicotinoylisolineolone                                                                                                                                                  |
| Anemarrhena asphodeloides | smilagenin                                                                                                                                                                   |
| Anemarrhena asphodeloides | nicotinicacid                                                                                                                                                                |
| Anemarrhena asphodeloides | makkogenin-3-o-beta-d-glucopyranosyl-(1->2)-beta-d-galactopyranoside                                                                                                         |
| Anemarrhena asphodeloides | (5 $\beta$ ,25s)-spirostan-3 $\beta$ ,15 $\alpha$ ,23 $\alpha$ -triol-3-o-d-glu-copyranosyl-(1 $\rightarrow$ 2)- $\beta$ -d-galactopyranoside                                |
| Anemarrhena asphodeloides | cthd0233276-21                                                                                                                                                               |
| Anemarrhena asphodeloides | spongesterol                                                                                                                                                                 |
| Anemarrhena asphodeloides | pentacosyl vinyl ester                                                                                                                                                       |
| Anemarrhena asphodeloides | manguferin                                                                                                                                                                   |
| Anemarrhena asphodeloides | smilagenin-3-o[beta-d-glucopyranosyl-(1-2)]-beta-d-mannopyranoside                                                                                                           |
| Anemarrhena asphodeloides | p-hydroxyphenyl crotonicacid                                                                                                                                                 |
| Anemarrhena asphodeloides | (25s)-26-o- $\beta$ -d-glucopyranosyl-22-hydroxy-5 $\beta$ -furostane-3 $\beta$ ,26-diol 3-o- $\beta$ -d-glucopy-ranosyl-(1 $\rightarrow$ 2)-o- $\beta$ -d-galactopyranoside |
| Anemarrhena asphodeloides | xuelianlacton e                                                                                                                                                              |
| Anemarrhena asphodeloides | marmesin                                                                                                                                                                     |
| Anemarrhena asphodeloides | timosaponin a-1                                                                                                                                                              |

**Supplement Table S2** GO enrichment analysis result of GSZ formula. Gene ontology analysis was implemented by Cytoscape 3.2.1 with ClueGo plugin. Enriched GO terms and pathways were defined as those with adjust P-value <0.05.

| GO Term                                                           | GO Levels | Nr. Genes | % Associated Genes | Term P-value |
|-------------------------------------------------------------------|-----------|-----------|--------------------|--------------|
| leukocyte differentiation                                         | [4]       | 79        | 19.458128          | 2.62E-04     |
| myeloid cell differentiation                                      | [4]       | 64        | 20.447285          | 2.75E-04     |
| positive regulation of leukocyte migration                        | [2, 3]    | 23        | 28.04878           | 4.07E-04     |
| regulation of myeloid leukocyte differentiation                   | [3, 6]    | 25        | 26.31579           | 6.63E-04     |
| positive regulation of lymphocyte activation                      | [3, 4]    | 51        | 20.564516          | 0.001110119  |
| regulation of lymphocyte proliferation                            | [4]       | 38        | 22.093023          | 0.001280333  |
| regulation of osteoclast differentiation                          | [4, 7]    | 16        | 30.188679          | 0.001330658  |
| positive regulation of myeloid cell differentiation               | [3, 5, 6] | 20        | 27.027027          | 0.001610784  |
| positive regulation of leukocyte chemotaxis                       | [3, 4]    | 17        | 28.333334          | 0.002058184  |
| positive regulation of lymphocyte proliferation                   | [4, 5]    | 27        | 23.68421           | 0.002310227  |
| cellular response to interferon-gamma                             | [4]       | 25        | 24.271845          | 0.002333111  |
| positive regulation of leukocyte activation                       | [2, 3]    | 53        | 19.702602          | 0.002473024  |
| regulation of lymphocyte activation                               | [3]       | 66        | 18.75              | 0.002682818  |
| hemopoiesis                                                       | [3]       | 108       | 17.11569           | 0.002914032  |
| response to interferon-gamma                                      | [3]       | 28        | 22.764227          | 0.003582403  |
| regulation of production of molecular mediator of immune response | [2, 3]    | 20        | 24.691359          | 0.005111878  |
| lymphocyte proliferation                                          | [3]       | 45        | 19.48052           | 0.006683075  |
| regulation of cytokine production involved in immune response     | [3, 4]    | 14        | 27.450981          | 0.0068537    |
| regulation of complement activation                               | [3, 4, 5] | 10        | 31.25              | 0.008168445  |
| positive regulation of myeloid leukocyte differentiation          | [4, 6, 7] | 12        | 27.906977          | 0.010450269  |
| regulation of leukocyte chemotaxis                                | [3]       | 17        | 23.943663          | 0.01309351   |
| positive regulation of T cell activation                          | [4, 5]    | 37        | 19.473684          | 0.013763082  |
| macrophage activation                                             | [3]       | 13        | 26                 | 0.014522206  |
| regulation of immunoglobulin production                           | [3, 4]    | 11        | 27.5               | 0.015672519  |
| myeloid leukocyte mediated immunity                               | [3]       | 14        | 25                 | 0.016145371  |
| positive regulation of immune effector process                    | [2, 3]    | 27        | 20.610687          | 0.016616912  |
| T cell activation                                                 | [3]       | 70        | 17.156862          | 0.018627138  |
| positive regulation of B cell activation                          | [4, 5]    | 15        | 23.809525          | 0.020218682  |
| regulation of T cell activation                                   | [4]       | 48        | 18.113207          | 0.020397456  |
| T cell proliferation                                              | [4]       | 29        | 19.594595          | 0.025805197  |
| lymphocyte costimulation                                          | [1, 4, 5] | 18        | 21.95122           | 0.02593301   |
| B cell activation                                                 | [3]       | 39        | 18.396227          | 0.028224325  |
| B cell activation involved in immune response                     | [4, 5]    | 12        | 24.489796          | 0.02926758   |
| granulocyte migration                                             | [3]       | 18        | 21.17647           | 0.036223979  |
| regulation of humoral immune response                             | [3]       | 12        | 23.529411          | 0.039086589  |
| granulocyte chemotaxis                                            | [3, 4]    | 17        | 20.987654          | 0.044426637  |
| B cell proliferation                                              | [4]       | 18        | 20.454546          | 0.049243673  |
| pattern recognition receptor signaling pathway                    | [4, 6, 7] | 32        | 18.181818          | 0.051670824  |
| innate immune response-activating signal transduction             | [3, 5, 6] | 32        | 17.877094          | 0.063011232  |

|                                                                                                                                                  |           |    |            |             |
|--------------------------------------------------------------------------------------------------------------------------------------------------|-----------|----|------------|-------------|
| regulation of B cell activation                                                                                                                  | [4]       | 19 | 19.58763   | 0.064443742 |
| activation of innate immune response                                                                                                             | [2, 4, 5] | 33 | 17.741936  | 0.065141854 |
| neutrophil chemotaxis                                                                                                                            | [4, 5]    | 13 | 20.967741  | 0.073816625 |
| neutrophil migration                                                                                                                             | [4]       | 13 | 20.967741  | 0.073816625 |
| positive regulation of leukocyte differentiation                                                                                                 | [3, 5, 6] | 21 | 18.75      | 0.07929956  |
| regulation of leukocyte mediated immunity                                                                                                        | [3]       | 22 | 17.741936  | 0.117936383 |
| regulation of innate immune response                                                                                                             | [3]       | 45 | 16.18705   | 0.122565024 |
| lymphocyte activation involved in immune response                                                                                                | [3, 4]    | 21 | 17.355371  | 0.14724319  |
| positive regulation of innate immune response                                                                                                    | [3, 4]    | 35 | 16.203703  | 0.158803532 |
| somatic diversification of immune receptors via germline recombination within a single locus                                                     | [2, 3]    | 11 | 18.965517  | 0.163161453 |
| T cell differentiation                                                                                                                           | [4, 6]    | 30 | 16.216217  | 0.181040371 |
| lymphocyte differentiation                                                                                                                       | [3, 5]    | 43 | 15.693431  | 0.181980394 |
| somatic diversification of immunoglobulins                                                                                                       | [2, 3]    | 10 | 18.867924  | 0.182524584 |
| positive regulation of leukocyte mediated immunity                                                                                               | [3, 4]    | 12 | 18.181818  | 0.18620082  |
| leukocyte activation involved in immune response                                                                                                 | [2, 3]    | 29 | 16.022099  | 0.205292316 |
| erythrocyte differentiation                                                                                                                      | [3, 5]    | 18 | 16.82243   | 0.207469395 |
| negative regulation of lymphocyte proliferation                                                                                                  | [4, 5]    | 10 | 17.857143  | 0.232143454 |
| negative regulation of leukocyte activation                                                                                                      | [2, 3]    | 20 | 16.260162  | 0.237696445 |
| B cell differentiation                                                                                                                           | [4, 6]    | 17 | 16.346153  | 0.253927364 |
| positive regulation of adaptive immune response                                                                                                  | [3, 4]    | 11 | 17.1875    | 0.256802912 |
| regulation of T cell differentiation                                                                                                             | [4, 5, 7] | 15 | 15.789474  | 0.320337425 |
| positive regulation of adaptive immune response based on somatic recombination of immune receptors built from immunoglobulin superfamily domains | [4, 5]    | 10 | 16.393442  | 0.324055278 |
| regulation of adaptive immune response                                                                                                           | [3]       | 18 | 15.5172415 | 0.324297191 |
| negative regulation of lymphocyte activation                                                                                                     | [3, 4]    | 16 | 15.53398   | 0.336860504 |
| negative regulation of leukocyte differentiation                                                                                                 | [3, 5, 6] | 11 | 15.942029  | 0.345940478 |
| positive regulation of lymphocyte mediated immunity                                                                                              | [4, 5]    | 10 | 15.873015  | 0.362879004 |
| regulation of lymphocyte mediated immunity                                                                                                       | [4]       | 15 | 15.306123  | 0.367088115 |
| hematopoietic progenitor cell differentiation                                                                                                    | [4]       | 13 | 15.294118  | 0.383440045 |
| negative regulation of T cell activation                                                                                                         | [4, 5]    | 11 | 15.068493  | 0.420676973 |
| negative regulation of immune response                                                                                                           | [2, 3]    | 10 | 15.151515  | 0.422015421 |
| alpha-beta T cell activation                                                                                                                     | [4]       | 14 | 14.43299   | 0.466089097 |
| T cell mediated immunity                                                                                                                         | [4]       | 11 | 14.473684  | 0.476887152 |
| regulation of adaptive immune response based on somatic recombination of immune receptors built from immunoglobulin superfamily domains          | [4]       | 15 | 14.018692  | 0.510532189 |
| regulation of lymphocyte differentiation                                                                                                         | [3, 4, 6] | 17 | 13.934426  | 0.516671269 |
| T cell activation involved in immune response                                                                                                    | [4, 5]    | 10 | 13.888889  | 0.538687456 |
| antigen receptor-mediated signaling pathway                                                                                                      | [4, 6, 7] | 21 | 13.636364  | 0.553628477 |
| negative regulation of myeloid cell differentiation                                                                                              | [3, 5, 6] | 10 | 13.157895  | 0.611682214 |
| positive regulation of immune response                                                                                                           | [2, 3]    | 87 | 13.384615  | 0.644244342 |
| regulation of defense response to virus                                                                                                          | [3]       | 10 | 12.345679  | 0.694169113 |

|                                                            |           |    |           |             |
|------------------------------------------------------------|-----------|----|-----------|-------------|
| immune response-regulating signaling pathway               | [3]       | 80 | 12.924071 | 0.77349101  |
| activation of immune response                              | [1, 3, 4] | 72 | 12.788632 | 0.79332221  |
| immune response-regulating cell surface receptor signaling | [4]       | 60 | 12.42236  | 0.845445042 |
| adaptive immune response based on somatic recombination of | [3]       | 40 | 11.594203 | 0.9114423   |
| B cell mediated immunity                                   | [4]       | 26 | 10.878661 | 0.930387853 |
| immune response-activating signal transduction             | [2, 4, 5] | 57 | 11.309524 | 0.970348188 |

**Supplementary Table S3** Pathway enrichment analysis result of GZS formula targets. DAVID Bioinformatics Resources 6.7 (<http://david.abcc.ncifcrf.gov/>) was used to carry out pathway enrichment for the 1,327 genes targeted by GSZ decoction. Totally 57 pathways were enriched.

| pathway                                      | Genes number | P-value  | Class                                                    |
|----------------------------------------------|--------------|----------|----------------------------------------------------------|
| Neuroactive ligand-receptor interaction      | 139          | 1.80E-45 | Environmental Information Processing                     |
| Calcium signaling pathway                    | 73           | 4.10E-15 | Environmental Information Processing                     |
| Glycolysis / Gluconeogenesis                 | 27           | 7.90E-07 | Metabolism- Carbohydrate metabolism                      |
| beta-Alanine metabolism                      | 15           | 9.00E-07 | Metabolism- Carbohydrate metabolism                      |
| Pyruvate metabolism                          | 22           | 1.70E-07 | Metabolism-Carbohydrate metabolism                       |
| Drug metabolism                              | 32           | 9.30E-10 | Metabolism- Xenobiotics biodegradation and metabolism    |
| Drug metabolism                              | 22           | 8.30E-07 | Metabolism- Xenobiotics biodegradation and metabolism    |
| Metabolism of xenobiotics by cytochrome P450 | 30           | 8.90E-09 | Metabolism- Xenobiotics biodegradation and metabolism    |
| Tyrosine metabolism                          | 22           | 1.30E-06 | Metabolism-Amino acid metabolism                         |
| Linoleic acid metabolism                     | 27           | 9.20E-19 | Metabolism-Lipid metabolism                              |
| Arachidonic acid metabolism                  | 36           | 9.50E-15 | Metabolism-Lipid metabolism                              |
| Ether lipid metabolism                       | 24           | 9.10E-11 | Metabolism-Lipid metabolism                              |
| alpha-Linolenic acid metabolism              | 16           | 8.50E-10 | Metabolism-Lipid metabolism                              |
| Glycerophospholipid metabolism               | 31           | 6.80E-08 | Metabolism-Lipid metabolism                              |
| Retinol metabolism                           | 27           | 5.80E-08 | Metabolism-Metabolism of cofactors and vitamins          |
| Fatty acid metabolism                        | 24           | 4.20E-09 | Metabolism-Overview                                      |
| PPAR signaling pathway                       | 42           | 6.30E-16 | Organismal Systems-Endocrine system                      |
| Adipocytokine signaling pathway              | 35           | 8.30E-11 | Organismal Systems-Endocrine system                      |
| GnRH signaling pathway                       | 39           | 8.60E-08 | Organismal Systems-Endocrine system                      |
| Fc epsilon RI signaling pathway              | 30           | 7.90E-06 | Organismal Systems-Immune system                         |
| Vascular smooth muscle contraction           | 38           | 1.10E-05 | Organismal Systems-Circulatory system                    |
| Apoptosis                                    | 31           | 3.10E-05 | Cellular Processes-Cell growth and death                 |
| VEGF signaling pathway                       | 28           | 3.20E-05 | Environmental Information Processing-Signal transduction |
| Bladder cancer                               | 19           | 4.80E-05 | Human Diseases-cancers                                   |
| Complement and coagulation cascades          | 26           | 5.50E-05 | Organismal Systems-Immune system                         |
| Tryptophan metabolism                        | 18           | 8.90E-05 | Metabolism-Amino acid metabolism                         |
| Long-term depression                         | 25           | 1.60E-04 | Organismal Systems-Nervous system                        |
| Base excision repair                         | 16           | 2.10E-04 | Metabolism-Genetic Information Processing                |
| Histidine metabolism                         | 14           | 3.20E-04 | Metabolism-Amino acid metabolism                         |
| Prostate cancer                              | 29           | 3.40E-04 | Human Diseases-cancers                                   |
| Amyotrophic lateral sclerosis (ALS)          | 20           | 5.00E-04 | Human Diseases-Neurodegenerative diseases                |
| Prion diseases                               | 15           | 7.80E-04 | Human Diseases-Neurodegenerative diseases                |
| Propanoate metabolism                        | 14           | 1.00E-03 | Metabolism-Carbohydrate metabolism                       |
| NOD-like receptor signaling pathway          | 21           | 1.60E-03 | Organismal Systems- Immune system                        |



|                                          |    |          |                                                          |
|------------------------------------------|----|----------|----------------------------------------------------------|
| Type II diabetes mellitus                | 17 | 2.50E-03 | Human Diseases-Endocrine and metabolic diseases          |
| Arginine and proline metabolism          | 18 | 3.80E-03 | Metabolism-Amino acid metabolism                         |
| Pancreatic cancer                        | 22 | 5.00E-03 | Human Diseases-cancers                                   |
| Steroid hormone biosynthesis             | 16 | 5.40E-03 | Metabolism-Lipid metabolism                              |
| Phenylalanine metabolism                 | 10 | 5.70E-03 | Metabolism-Amino acid metabolism                         |
| ErbB signaling pathway                   | 25 | 6.10E-03 | Environmental Information Processing-Signal transduction |
| Insulin signaling pathway                | 35 | 6.10E-03 | Organismal Systems-Endocrine system                      |
| Pathways in cancer                       | 72 | 7.60E-03 | Human Diseases-Cancers: Overview                         |
| Methane metabolism                       | 5  | 8.40E-03 | Metabolism-Energy metabolism                             |
| Glioma                                   | 19 | 1.10E-02 | Human Diseases-cancers                                   |
| Nicotinate and nicotinamide metabolism   | 10 | 1.10E-02 | Metabolism-Metabolism of cofactors and vitamins          |
| T cell receptor signaling pathway        | 28 | 1.50E-02 | Organismal Systems-Immune system                         |
| Caffeine metabolism                      | 5  | 1.70E-02 | Metabolism-Biosynthesis of other secondary metabolites   |
| Butanoate metabolism                     | 12 | 1.70E-02 | Metabolism-Carbohydrate metabolism                       |
| Neurotrophin signaling pathway           | 31 | 1.70E-02 | Organismal Systems-Nervous system                        |
| Toll-like receptor signaling pathway     | 26 | 2.10E-02 | Organismal Systems- Immune system                        |
| Glycine, serine and threonine metabolism | 11 | 2.30E-02 | Metabolism-Amino acid metabolism                         |
| Non-small cell lung cancer               | 16 | 2.50E-02 | Human Diseases-cancers                                   |
| MAPK signaling pathway                   | 57 | 3.00E-02 | Environmental Information Processing-Signal transduction |
| Small cell lung cancer                   | 22 | 3.00E-02 | Human Diseases-cancers                                   |
| Starch and sucrose metabolism            | 13 | 3.50E-02 | Metabolism-Carbohydrate metabolism                       |
| One carbon pool by folate                | 7  | 3.60E-02 | Metabolism-Metabolism of cofactors and vitamins          |
| Endometrial cancer                       | 15 | 3.90E-02 | Human Diseases-cancers                                   |

**Supplementary Table S4** The list of drugs for RA treatment and drug targets. 79 targets of FDA 30 approved RA drugs were retrieved from DrugBank 4.0 (<http://www.drugbank.ca>).

| <b>Drug name</b>           | <b>Target name</b>                                         | <b>Target ID</b> |
|----------------------------|------------------------------------------------------------|------------------|
| Etanercept                 | Tumor necrosis factor                                      | 7124             |
| Etanercept                 | Tumor necrosis factor receptor superfamily member 1B       | 7133             |
| Etanercept                 | High affinity immunoglobulin gamma Fc receptor I           | 2209             |
| Etanercept                 | High affinity immunoglobulin gamma Fc receptor I           | 100132417        |
| Etanercept                 | Low affinity immunoglobulin gamma Fc region receptor III-A | 2214             |
| Etanercept                 | Low affinity immunoglobulin gamma Fc region receptor III-A | 2215             |
| Etanercept                 | Low affinity immunoglobulin gamma Fc region receptor II-a  | 2212             |
| Etanercept                 | Low affinity immunoglobulin gamma Fc region receptor II-a  | 9103             |
| Etanercept                 | Low affinity immunoglobulin gamma Fc region receptor II-b  | 2213             |
| Etanercept                 | Low affinity immunoglobulin gamma Fc region receptor II-b  | 9103             |
| Etanercept                 | Low affinity immunoglobulin gamma Fc region receptor II-c  | 9103             |
| Etanercept                 | Lymphotoxin-alpha                                          | 4049             |
| Etanercept                 | Low affinity immunoglobulin gamma Fc region receptor III-B | 2215             |
| Etanercept                 | Low affinity immunoglobulin gamma Fc region receptor III-B | 2214             |
| Etanercept                 | Complement C1s subcomponent                                | 716              |
| Etanercept                 | Complement C1r subcomponent                                | 715              |
| Etanercept                 | Complement C1q subcomponent subunit A                      | 712              |
| Etanercept                 | Complement C1q subcomponent subunit B                      | 713              |
| Etanercept                 | Complement C1q subcomponent subunit C                      | 714              |
| Intravenous Immunoglobulin | High affinity immunoglobulin gamma Fc receptor I           | 2209             |
| Intravenous Immunoglobulin | High affinity immunoglobulin gamma Fc receptor I           | 100132417        |
| Intravenous Immunoglobulin | High affinity immunoglobulin gamma Fc receptor IB          | 2210             |
| Intravenous Immunoglobulin | Low affinity immunoglobulin gamma Fc region receptor II-a  | 2212             |
| Intravenous Immunoglobulin | Low affinity immunoglobulin gamma Fc region receptor II-a  | 9103             |
| Intravenous Immunoglobulin | Low affinity immunoglobulin gamma Fc region receptor II-b  | 2213             |
| Intravenous Immunoglobulin | Low affinity immunoglobulin gamma Fc region receptor II-b  | 9103             |
| Intravenous Immunoglobulin | Low affinity immunoglobulin gamma Fc region receptor II-c  | 9103             |
| Intravenous Immunoglobulin | Low affinity immunoglobulin gamma Fc region receptor III-A | 2214             |
| Intravenous Immunoglobulin | Low affinity immunoglobulin gamma Fc region receptor III-A | 2215             |
| Intravenous Immunoglobulin | Low affinity immunoglobulin gamma Fc region receptor III-B | 2215             |

|                            |                                                            |           |
|----------------------------|------------------------------------------------------------|-----------|
| Intravenous Immunoglobulin | Low affinity immunoglobulin gamma Fc region receptor III-B | 2214      |
| Intravenous Immunoglobulin | Complement C3                                              | 718       |
| Intravenous Immunoglobulin | Complement C4-A                                            | 720       |
| Intravenous Immunoglobulin | Complement C4-A                                            | 721       |
| Intravenous Immunoglobulin | Complement C4-B                                            | 721       |
| Intravenous Immunoglobulin | Complement C4-B                                            | 100293534 |
| Intravenous Immunoglobulin | Complement C5                                              | 727       |
| Adalimumab                 | Tumor necrosis factor                                      | 7124      |
| Adalimumab                 | Low affinity immunoglobulin gamma Fc region receptor III-B | 2215      |
| Adalimumab                 | Low affinity immunoglobulin gamma Fc region receptor III-B | 2214      |
| Adalimumab                 | Complement C1r subcomponent                                | 715       |
| Adalimumab                 | Complement C1q subcomponent subunit A                      | 712       |
| Adalimumab                 | Complement C1q subcomponent subunit B                      | 713       |
| Adalimumab                 | Complement C1q subcomponent subunit C                      | 714       |
| Adalimumab                 | Low affinity immunoglobulin gamma Fc region receptor III-A | 2214      |
| Adalimumab                 | Low affinity immunoglobulin gamma Fc region receptor III-A | 2215      |
| Adalimumab                 | Complement C1s subcomponent                                | 716       |
| Adalimumab                 | High affinity immunoglobulin gamma Fc receptor I           | 2209      |
| Adalimumab                 | High affinity immunoglobulin gamma Fc receptor I           | 100132417 |
| Adalimumab                 | Low affinity immunoglobulin gamma Fc region receptor II-a  | 2212      |
| Adalimumab                 | Low affinity immunoglobulin gamma Fc region receptor II-a  | 9103      |
| Adalimumab                 | Low affinity immunoglobulin gamma Fc region receptor II-b  | 2213      |
| Adalimumab                 | Low affinity immunoglobulin gamma Fc region receptor II-b  | 9103      |
| Adalimumab                 | Low affinity immunoglobulin gamma Fc region receptor II-c  | 9103      |
| Infliximab                 | Tumor necrosis factor                                      | 7124      |
| Rituximab                  | Low affinity immunoglobulin gamma Fc region receptor III-B | 2215      |
| Rituximab                  | Low affinity immunoglobulin gamma Fc region receptor III-B | 2214      |
| Rituximab                  | Complement C1r subcomponent                                | 715       |
| Rituximab                  | Complement C1q subcomponent subunit A                      | 712       |
| Rituximab                  | Complement C1q subcomponent subunit B                      | 713       |
| Rituximab                  | Complement C1q subcomponent subunit C                      | 714       |
| Rituximab                  | Low affinity immunoglobulin gamma Fc region receptor III-A | 2214      |
| Rituximab                  | Low affinity immunoglobulin gamma Fc region receptor III-A | 2215      |

|              |                                                                         |           |
|--------------|-------------------------------------------------------------------------|-----------|
| Rituximab    | Complement C1s subcomponent                                             | 716       |
| Rituximab    | High affinity immunoglobulin gamma Fc receptor I                        | 2209      |
| Rituximab    | High affinity immunoglobulin gamma Fc receptor I                        | 100132417 |
| Rituximab    | Low affinity immunoglobulin gamma Fc region receptor II-a               | 2212      |
| Rituximab    | Low affinity immunoglobulin gamma Fc region receptor II-a               | 9103      |
| Rituximab    | Low affinity immunoglobulin gamma Fc region receptor II-b               | 2213      |
| Rituximab    | Low affinity immunoglobulin gamma Fc region receptor II-b               | 9103      |
| Rituximab    | Low affinity immunoglobulin gamma Fc region receptor II-c               | 9103      |
| Rituximab    | B-lymphocyte antigen CD20                                               | 2206      |
| Rituximab    | B-lymphocyte antigen CD20                                               | 54474     |
| Cyclosporine | Calcium signal-modulating cyclophilin ligand                            | 819       |
| Cyclosporine | Calcineurin subunit B type 2                                            | 5535      |
| Cyclosporine | Peptidyl-prolyl cis-trans isomerase A                                   | 5478      |
| Cyclosporine | "Peptidyl-prolyl cis-trans isomerase F, mitochondrial"                  | 10105     |
| L-Histidine  | Histidine decarboxylase                                                 | 51696     |
| L-Histidine  | "Histidine--tRNA ligase, cytoplasmic"                                   | 3035      |
| L-Histidine  | "Histidine--tRNA ligase, cytoplasmic"                                   | 9146      |
| L-Histidine  | Sodium-coupled neutral amino acid transporter 3                         | 10991     |
| L-Histidine  | Histidine ammonia-lyase                                                 | 3034      |
| L-Histidine  | Histidine ammonia-lyase                                                 | 57016     |
| L-Cystine    | Cystine/glutamate transporter                                           | 23657     |
| L-Cystine    | Cystinosin                                                              | 1497      |
| L-Cystine    | "B(0,+)-type amino acid transporter 1"                                  | 11136     |
| L-Cystine    | Neutral and basic amino acid transport protein rBAT                     | 6519      |
| Vitamin E    | SEC14-like protein 4                                                    | 284904    |
| Vitamin E    | SEC14-like protein 3                                                    | 266629    |
| Vitamin E    | SEC14-like protein 2                                                    | 23541     |
| Vitamin E    | Nuclear receptor subfamily 1 group I member 2                           | 8856      |
| Vitamin E    | Protein kinase C beta type                                              | 5579      |
| Vitamin E    | Arachidonate 5-lipoxygenase                                             | 240       |
| Vitamin E    | Protein kinase C alpha type                                             | 5578      |
| Vitamin E    | Diacylglycerol kinase alpha                                             | 1606      |
| Vitamin E    | Diacylglycerol kinase alpha                                             | 1609      |
| Vitamin E    | Serine/threonine-protein phosphatase 2A catalytic subunit beta isoform  | 5516      |
| Vitamin E    | Serine/threonine-protein phosphatase 2A catalytic subunit alpha isoform | 5515      |
| Indomethacin | Prostaglandin G/H synthase 1                                            | 5742      |
| Indomethacin | Prostaglandin G/H synthase 2                                            | 5743      |
| Indomethacin | "Phospholipase A2, membrane associated"                                 | 5320      |
| Indomethacin | "Phospholipase A2, membrane associated"                                 | 729330    |
| Indomethacin | Prostaglandin reductase 2                                               | 145482    |
| Indomethacin | Peroxisome proliferator-activated receptor gamma                        | 5468      |
| Indomethacin | Lactoylgutathione lyase                                                 | 2739      |
| Indomethacin | Prostaglandin D2 receptor 2                                             | 11251     |
| Indomethacin | Peroxisome proliferator-activated receptor alpha                        | 5465      |
| Nabumetone   | Prostaglandin G/H synthase 2                                            | 5743      |

|                    |                                                          |       |
|--------------------|----------------------------------------------------------|-------|
| Nabumetone         | Prostaglandin G/H synthase 1                             | 5742  |
| Tenoxicam          | Prostaglandin G/H synthase 2                             | 5743  |
| Tenoxicam          | Prostaglandin G/H synthase 1                             | 5742  |
| Piroxicam          | Prostaglandin G/H synthase 2                             | 5743  |
| Piroxicam          | Prostaglandin G/H synthase 1                             | 5742  |
| Fenoprofen         | Prostaglandin G/H synthase 1                             | 5742  |
| Fenoprofen         | Prostaglandin G/H synthase 2                             | 5743  |
| Etodolac           | Prostaglandin G/H synthase 2                             | 5743  |
| Etodolac           | Prostaglandin G/H synthase 1                             | 5742  |
| Etodolac           | Retinoic acid receptor RXR-alpha                         | 6256  |
| Mefenamic acid     | Prostaglandin G/H synthase 2                             | 5743  |
| Mefenamic acid     | Prostaglandin G/H synthase 1                             | 5742  |
| Naproxen           | Prostaglandin G/H synthase 2                             | 5743  |
| Naproxen           | Prostaglandin G/H synthase 1                             | 5742  |
| Sulfasalazine      | Arachidonate 5-lipoxygenase                              | 240   |
| Sulfasalazine      | Prostaglandin G/H synthase 2                             | 5743  |
| Sulfasalazine      | Prostaglandin G/H synthase 1                             | 5742  |
| Sulfasalazine      | Peroxisome proliferator-activated receptor gamma         | 5468  |
| Sulfasalazine      | Inhibitor of nuclear factor kappa-B kinase subunit alpha | 1147  |
| Sulfasalazine      | Inhibitor of nuclear factor kappa-B kinase subunit beta  | 3551  |
| Sulfasalazine      | Cystine/glutamate transporter                            | 23657 |
| Sulfasalazine      | "Acetyl-CoA acetyltransferase, mitochondrial"            | 6646  |
| Sulfasalazine      | "Acetyl-CoA acetyltransferase, mitochondrial"            | 4143  |
| Sulfasalazine      | Thromboxane-A synthase                                   | 6916  |
| Sulfasalazine      | Phospholipase A2                                         | 5319  |
| Sulfasalazine      | Phospholipase A2                                         | 8398  |
| Phenylbutazone     | Prostaglandin G/H synthase 2                             | 5743  |
| Phenylbutazone     | Prostacyclin synthase                                    | 5740  |
| Phenylbutazone     | Prostaglandin G/H synthase 1                             | 5742  |
| Meclofenamic acid  | Prostaglandin G/H synthase 1                             | 5742  |
| Meclofenamic acid  | Prostaglandin G/H synthase 2                             | 5743  |
| Meclofenamic acid  | Arachidonate 5-lipoxygenase                              | 240   |
| Meclofenamic acid  | Potassium voltage-gated channel subfamily KQT member 2   | 3785  |
| Meclofenamic acid  | Potassium voltage-gated channel subfamily KQT member 3   | 3786  |
| Methylprednisolone | Glucocorticoid receptor                                  | 2908  |
| Methylprednisolone | Glucocorticoid receptor                                  | 23493 |
| Oxaprozin          | Prostaglandin G/H synthase 1                             | 5742  |
| Oxaprozin          | Prostaglandin G/H synthase 2                             | 5743  |
| Azathioprine       | Hypoxanthine-guanine phosphoribosyltransferase           | 3251  |
| Leflunomide        | "Dihydroorotate dehydrogenase (quinone), mitochondrial"  | 1723  |
| Leflunomide        | Aryl hydrocarbon receptor                                | 196   |
| Leflunomide        | Protein-tyrosine kinase 2-beta                           | 2185  |
| Abatacept          | T-lymphocyte activation antigen CD80                     | 941   |
| Abatacept          | T-lymphocyte activation antigen CD86                     | 942   |
| Salsalate          | Prostaglandin G/H synthase 2                             | 5743  |
| Salsalate          | Prostaglandin G/H synthase 1                             | 5742  |
| Hydroxychloroquine | Toll-like receptor 7                                     | 51284 |

|                    |                                      |       |
|--------------------|--------------------------------------|-------|
| Hydroxychloroquine | Toll-like receptor 9                 | 54106 |
| Etoricoxib         | Prostaglandin G/H synthase 2         | 5743  |
| Temsirolimus       | Serine/threonine-protein kinase mTOR | 2475  |
| Belatacept         | T-lymphocyte activation antigen CD86 | 942   |
| Belatacept         | T-lymphocyte activation antigen CD80 | 941   |

**Supplementary Table S5** Disease genes and supplied database. Genes associated with RA, announced as disease genes were collected from three databases: OMIM (<http://www.omim.org>), GAD (<http://geneticassociationdb.nih.gov/>) and KEGG (<http://www.kegg.jp>). This table lists the Gene ID of 675 disease genes and data source.

| Gene ID | database | Gene ID | database      | Gene ID | database  | Gene ID | database |
|---------|----------|---------|---------------|---------|-----------|---------|----------|
| 2       | GAD      | 3303    | GAD           | 6309    | GAD       | 23275   | GAD      |
| 10      | GAD      | 3305    | GAD           | 6311    | GAD       | 23406   | GAD      |
| 54      | KEGG     | 3329    | GAD           | 6347    | KEGG,OMIM | 23495   | OMIM     |
| 100     | GAD      | 3356    | GAD           | 6348    | GAD       | 23517   | GAD      |
| 135     | GAD      | 3383    | KEGG,GAD      | 6349    | KEGG,GAD  | 23526   | GAD      |
| 142     | GAD      | 3385    | GAD           | 6352    | KEGG,GAD  | 23534   | GAD      |
| 154     | GAD      | 3394    | GAD           | 6364    | KEGG      | 23545   | KEGG     |
| 155     | GAD      | 3456    | GAD           | 6366    | GAD       | 23569   | GAD,OMIM |
| 176     | GAD      | 3458    | KEGG,GAD,OMIM | 6372    | KEGG      | 23601   | OMIM     |
| 199     | GAD      | 3459    | GAD           | 6374    | KEGG      | 25898   | GAD      |
| 214     | OMIM     | 3478    | OMIM          | 6387    | KEGG,OMIM | 26147   | GAD      |
| 270     | GAD      | 3514    | OMIM          | 6399    | OMIM      | 26191   | GAD,OMIM |
| 284     | KEGG     | 3516    | GAD           | 6401    | GAD       | 26525   | GAD      |
| 306     | GAD      | 3551    | GAD           | 6441    | GAD       | 26762   | GAD      |
| 326     | GAD      | 3552    | KEGG,GAD      | 6470    | GAD       | 27164   | GAD      |
| 331     | GAD      | 3553    | KEGG,GAD,OMIM | 6504    | OMIM      | 27177   | GAD      |
| 348     | GAD      | 3554    | GAD           | 6538    | GAD       | 27178   | GAD      |
| 367     | GAD      | 3557    | GAD,OMIM      | 6556    | GAD,OMIM  | 27179   | GAD      |
| 471     | GAD      | 3558    | GAD           | 6573    | GAD       | 28511   | GAD      |
| 523     | KEGG     | 3559    | GAD           | 6583    | GAD,OMIM  | 28512   | GAD      |
| 525     | KEGG     | 3560    | GAD,OMIM      | 6584    | GAD       | 28774   | GAD      |
| 526     | KEGG     | 3561    | OMIM          | 6648    | GAD       | 29113   | GAD      |
| 527     | KEGG     | 3562    | GAD,OMIM      | 6649    | GAD       | 29126   | GAD      |
| 528     | KEGG     | 3565    | GAD           | 6696    | GAD,OMIM  | 29800   | GAD      |
| 529     | KEGG     | 3566    | GAD           | 6772    | OMIM      | 29851   | GAD      |
| 533     | KEGG     | 3569    | KEGG,GAD,OMIM | 6774    | OMIM      | 29943   | OMIM     |
| 534     | KEGG     | 3570    | GAD           | 6775    | GAD,OMIM  | 29945   | GAD      |
| 535     | KEGG     | 3572    | GAD,OMIM      | 6778    | OMIM      | 29953   | GAD      |
| 537     | KEGG     | 3575    | GAD           | 6868    | GAD,OMIM  | 30009   | GAD,OMIM |
| 558     | OMIM     | 3576    | KEGG,GAD      | 6885    | GAD       | 30835   | GAD      |
| 567     | GAD      | 3577    | GAD           | 6890    | GAD       | 50617   | KEGG     |
| 608     | GAD      | 3579    | GAD           | 6891    | GAD       | 50619   | OMIM     |
| 636     | GAD      | 3581    | GAD           | 6938    | OMIM      | 50650   | GAD      |
| 639     | GAD      | 3586    | GAD,OMIM      | 6957    | GAD       | 50852   | OMIM     |
| 640     | GAD      | 3587    | GAD           | 7010    | KEGG      | 51135   | GAD      |
| 650     | OMIM     | 3589    | KEGG          | 7018    | GAD       | 51206   | OMIM     |
| 654     | OMIM     | 3592    | GAD,OMIM      | 7026    | GAD       | 51266   | GAD      |
| 683     | OMIM     | 3593    | GAD           | 7036    | GAD       | 51284   | GAD      |
| 684     | OMIM     | 3594    | GAD           | 7040    | KEGG,GAD  | 51311   | GAD      |
| 840     | GAD      | 3600    | KEGG,GAD      | 7043    | KEGG      | 51561   | KEGG,GAD |

|      |          |      |                   |      |                   |       |          |
|------|----------|------|-------------------|------|-------------------|-------|----------|
| 847  | GAD      | 3604 | OMIM              | 7076 | GAD               | 51606 | KEGG     |
| 861  | GAD      | 3605 | KEGG,GAD,OMI<br>M | 7077 | GAD               | 51702 | OMIM     |
| 871  | OMIM     | 3606 | KEGG,GAD,OMI<br>M | 7079 | GAD               | 51744 | GAD,OMIM |
| 901  | GAD      | 3615 | GAD               | 7096 | GAD               | 53347 | GAD      |
| 914  | GAD      | 3630 | GAD               | 7097 | KEGG,GAD          | 53904 | GAD      |
| 917  | GAD      | 3654 | GAD               | 7098 | GAD               | 54106 | GAD      |
| 919  | GAD      | 3663 | GAD,OMIM          | 7099 | KEGG,GAD          | 54332 | GAD      |
| 920  | GAD      | 3683 | KEGG              | 7100 | GAD               | 54414 | GAD,OMIM |
| 929  | GAD      | 3685 | GAD               | 7103 | GAD,OMIM          | 54469 | GAD      |
| 930  | GAD      | 3689 | KEGG,OMIM         | 7124 | KEGG,GAD,OMI<br>M | 54826 | GAD      |
| 933  | GAD      | 3704 | GAD               | 7126 | GAD               | 54829 | GAD      |
| 934  | GAD      | 3710 | GAD               | 7128 | GAD,OMIM          | 54899 | GAD      |
| 940  | KEGG,GAD | 3725 | KEGG              | 7130 | OMIM              | 55024 | GAD      |
| 941  | KEGG,GAD | 3798 | GAD               | 7132 | GAD,OMIM          | 55068 | GAD      |
| 942  | KEGG,GAD | 3802 | GAD               | 7133 | GAD               | 55340 | GAD      |
| 958  | GAD      | 3803 | GAD               | 7148 | GAD,OMIM          | 55607 | GAD      |
| 959  | GAD      | 3804 | GAD               | 7157 | GAD,OMIM          | 55722 | GAD      |
| 960  | OMIM     | 3805 | GAD               | 7185 | GAD,OMIM          | 55801 | GAD      |
| 965  | GAD      | 3806 | GAD               | 7188 | GAD               | 55829 | GAD      |
| 969  | GAD      | 3807 | GAD               | 7189 | GAD               | 55937 | GAD      |
| 1009 | OMIM     | 3808 | GAD               | 7220 | OMIM              | 56005 | OMIM     |
| 1012 | GAD      | 3809 | GAD               | 7224 | OMIM              | 56244 | GAD      |
| 1021 | GAD      | 3810 | GAD               | 7227 | GAD               | 56300 | GAD      |
| 1026 | OMIM     | 3811 | GAD               | 7274 | GAD               | 56832 | GAD      |
| 1030 | GAD      | 3812 | GAD               | 7291 | OMIM              | 57140 | GAD      |
| 1066 | OMIM     | 3813 | GAD               | 7292 | GAD               | 57217 | GAD      |
| 1108 | OMIM     | 3821 | GAD               | 7297 | GAD               | 57579 | GAD      |
| 1139 | OMIM     | 3822 | GAD               | 7298 | GAD               | 57593 | GAD      |
| 1147 | GAD      | 3824 | GAD               | 7317 | GAD               | 57623 | GAD      |
| 1231 | GAD      | 3899 | GAD,OMIM          | 7351 | GAD               | 57650 | OMIM     |
| 1232 | GAD      | 3957 | GAD               | 7356 | GAD               | 57827 | GAD      |
| 1233 | GAD      | 3958 | OMIM              | 7412 | GAD               | 58189 | GAD      |
| 1234 | GAD,OMIM | 3983 | GAD               | 7421 | GAD               | 59067 | GAD      |
| 1235 | GAD      | 4026 | GAD               | 7422 | KEGG,GAD,OMI<br>M | 59331 | OMIM     |
| 1244 | GAD      | 4041 | GAD               | 7432 | OMIM              | 60412 | GAD      |
| 1280 | GAD      | 4049 | GAD               | 7454 | OMIM              | 60468 | GAD,OMIM |
| 1298 | GAD      | 4050 | KEGG,GAD          | 7458 | GAD               | 64127 | GAD      |
| 1302 | GAD      | 4118 | GAD               | 7515 | GAD               | 64135 | GAD      |
| 1401 | GAD      | 4146 | OMIM              | 7535 | OMIM              | 65217 | GAD      |
| 1432 | GAD      | 4153 | GAD               | 7538 | GAD,OMIM          | 79136 | GAD      |
| 1435 | KEGG     | 4193 | GAD               | 7728 | GAD               | 79155 | GAD      |
| 1437 | KEGG,GAD | 4210 | GAD,OMIM          | 7913 | GAD,OMIM          | 79258 | GAD      |



|      |               |      |          |      |               |        |          |
|------|---------------|------|----------|------|---------------|--------|----------|
| 1460 | GAD           | 4214 | GAD      | 7916 | GAD           | 79679  | GAD      |
| 1470 | GAD           | 4261 | GAD,OMIM | 7917 | GAD           | 79722  | GAD      |
| 1482 | GAD           | 4267 | GAD      | 7918 | GAD           | 79728  | GAD      |
| 1493 | KEGG,GAD,OMIM | 4276 | GAD      | 7919 | GAD           | 79817  | GAD      |
| 1512 | KEGG,GAD      | 4277 | GAD      | 7920 | GAD           | 79837  | GAD      |
| 1514 | KEGG          | 4282 | GAD,OMIM | 7940 | OMIM          | 80018  | GAD      |
| 1524 | GAD           | 4312 | KEGG,GAD | 8518 | GAD           | 80740  | GAD      |
| 1544 | GAD           | 4313 | GAD      | 8543 | GAD           | 80741  | GAD      |
| 1557 | GAD           | 4314 | KEGG,GAD | 8547 | GAD           | 80863  | GAD      |
| 1559 | GAD           | 4316 | GAD      | 8569 | GAD           | 81545  | GAD      |
| 1585 | GAD           | 4318 | GAD      | 8600 | KEGG,GAD      | 83648  | GAD      |
| 1586 | GAD           | 4321 | GAD      | 8651 | GAD           | 84159  | GAD      |
| 1588 | GAD           | 4322 | GAD      | 8718 | OMIM          | 84162  | GAD      |
| 1589 | GAD           | 4323 | OMIM     | 8737 | GAD           | 84447  | OMIM     |
| 1630 | GAD           | 4350 | GAD      | 8741 | KEGG,GAD,OMIM | 84516  | GAD      |
| 1636 | GAD           | 4363 | GAD      | 8764 | GAD           | 84619  | GAD      |
| 1719 | GAD           | 4439 | GAD      | 8771 | GAD           | 84639  | GAD      |
| 1723 | GAD           | 4522 | GAD      | 8792 | KEGG,GAD      | 84722  | GAD      |
| 1777 | GAD,OMIM      | 4524 | GAD      | 8807 | GAD           | 84868  | GAD      |
| 1789 | GAD           | 4540 | GAD      | 8836 | GAD           | 89978  | GAD      |
| 1826 | GAD           | 4543 | GAD      | 8838 | OMIM          | 90355  | GAD      |
| 1843 | GAD           | 4544 | GAD      | 8887 | GAD           | 90423  | KEGG     |
| 1906 | GAD           | 4548 | GAD      | 8914 | GAD           | 90865  | OMIM     |
| 1968 | GAD           | 4552 | GAD      | 8927 | GAD           | 91975  | GAD      |
| 2065 | GAD           | 4615 | GAD      | 8986 | GAD           | 112744 | GAD      |
| 2099 | GAD           | 4706 | GAD      | 8992 | KEGG          | 114548 | GAD,OMIM |
| 2100 | GAD           | 4790 | GAD      | 9020 | GAD,OMIM      | 114609 | GAD      |
| 2108 | GAD           | 4791 | GAD      | 9021 | GAD,OMIM      | 115352 | GAD,OMIM |
| 2113 | GAD           | 4792 | GAD      | 9047 | GAD           | 115653 | GAD      |
| 2162 | GAD           | 4793 | GAD      | 9051 | GAD           | 116154 | GAD      |
| 2212 | GAD           | 4794 | GAD      | 9114 | KEGG          | 117289 | GAD      |
| 2213 | GAD           | 4795 | GAD,OMIM | 9173 | GAD,OMIM      | 122402 | GAD      |
| 2214 | GAD,OMIM      | 4808 | GAD      | 9231 | GAD           | 122618 | GAD      |
| 2215 | GAD,OMIM      | 4843 | GAD      | 9235 | OMIM          | 122773 | GAD      |
| 2219 | GAD           | 4846 | GAD      | 9252 | GAD           | 122953 | GAD      |
| 2220 | GAD           | 4855 | GAD      | 9261 | GAD,OMIM      | 124626 | GAD      |
| 2244 | GAD           | 4929 | OMIM     | 9296 | KEGG          | 126410 | GAD      |
| 2302 | GAD           | 4982 | GAD      | 9315 | GAD           | 127124 | KEGG     |
| 2312 | GAD           | 5027 | GAD      | 9348 | GAD           | 127795 | GAD      |
| 2321 | KEGG,OMIM     | 5054 | GAD      | 9374 | GAD           | 132612 | GAD      |
| 2335 | OMIM          | 5079 | GAD      | 9378 | GAD           | 135228 | GAD      |
| 2348 | GAD           | 5133 | GAD      | 9398 | GAD           | 140805 | OMIM     |
| 2353 | KEGG,OMIM     | 5138 | GAD      | 9444 | GAD           | 144811 | OMIM     |
| 2356 | GAD           | 5211 | GAD      | 9536 | OMIM          | 147372 | GAD      |
| 2638 | GAD           | 5241 | GAD      | 9550 | KEGG          | 148738 | GAD      |

|      |               |      |          |       |               |           |          |
|------|---------------|------|----------|-------|---------------|-----------|----------|
| 2643 | GAD           | 5243 | GAD      | 9641  | GAD           | 149233    | GAD      |
| 2693 | GAD           | 5265 | GAD      | 9683  | GAD           | 151888    | GAD      |
| 2784 | GAD           | 5294 | OMIM     | 9692  | GAD           | 155066    | KEGG     |
| 2804 | OMIM          | 5320 | OMIM     | 9899  | GAD           | 161357    | GAD      |
| 2814 | OMIM          | 5321 | OMIM     | 9935  | GAD           | 163351    | GAD      |
| 2821 | OMIM          | 5327 | GAD      | 10010 | GAD           | 167826    | GAD      |
| 2833 | GAD           | 5328 | GAD      | 10019 | GAD           | 200734    | GAD      |
| 2908 | GAD           | 5444 | GAD      | 10148 | OMIM          | 201294    | GAD      |
| 2919 | KEGG          | 5453 | GAD      | 10203 | GAD           | 203228    | GAD      |
| 2944 | GAD           | 5468 | GAD      | 10266 | GAD           | 221687    | GAD      |
| 2948 | GAD           | 5551 | GAD      | 10312 | KEGG          | 245972    | KEGG     |
| 2950 | GAD           | 5579 | GAD      | 10333 | GAD           | 245973    | KEGG     |
| 2952 | GAD           | 5583 | GAD      | 10344 | GAD           | 259308    | GAD      |
| 2990 | OMIM          | 5588 | GAD,OMIM | 10347 | GAD           | 282890    | GAD      |
| 3002 | GAD           | 5603 | GAD      | 10454 | GAD           | 283635    | GAD      |
| 3039 | GAD           | 5606 | GAD      | 10461 | OMIM          | 342132    | GAD      |
| 3075 | GAD           | 5608 | GAD      | 10464 | GAD           | 345611    | GAD      |
| 3077 | GAD           | 5617 | GAD      | 10512 | OMIM          | 353143    | GAD      |
| 3106 | GAD           | 5654 | GAD,OMIM | 10599 | GAD           | 353144    | GAD      |
| 3107 | GAD,OMIM      | 5685 | GAD      | 10640 | GAD           | 374378    | GAD      |
| 3108 | KEGG,GAD      | 5687 | GAD      | 10665 | GAD           | 387082    | GAD      |
| 3109 | KEGG,GAD      | 5696 | OMIM     | 10666 | GAD           | 387129    | GAD      |
| 3111 | KEGG,GAD      | 5698 | GAD      | 10673 | KEGG,GAD,OMIM | 389203    | GAD      |
| 3112 | KEGG          | 5734 | GAD      | 10678 | GAD           | 391370    | GAD      |
| 3113 | KEGG          | 5743 | GAD      | 10746 | OMIM          | 399716    | GAD      |
| 3115 | KEGG,GAD      | 5771 | GAD      | 10859 | GAD,OMIM      | 406938    | GAD      |
| 3117 | KEGG,GAD,OMIM | 5777 | GAD      | 10956 | GAD           | 414062    | KEGG     |
| 3118 | KEGG,GAD      | 5788 | GAD      | 10986 | OMIM          | 643365    | GAD      |
| 3119 | KEGG,GAD      | 5873 | GAD      | 11061 | GAD           | 653361    | OMIM     |
| 3120 | GAD           | 5891 | GAD      | 11122 | GAD           | 728411    | GAD      |
| 3122 | KEGG,GAD      | 5896 | GAD      | 11167 | GAD,OMIM      | 729230    | OMIM     |
| 3123 | KEGG,GAD,OMIM | 5919 | GAD      | 11170 | GAD           | 100130458 | GAD      |
| 3124 | GAD           | 5966 | GAD,OMIM | 11213 | GAD           | 100132285 | GAD,OMIM |
| 3125 | KEGG          | 5970 | GAD      | 11240 | OMIM          | 100188846 | OMIM     |
| 3126 | KEGG          | 5971 | GAD      | 11270 | GAD           | 100196918 | OMIM     |
| 3127 | KEGG,GAD      | 5981 | GAD      | 11278 | GAD           | 100306940 | OMIM     |
| 3135 | GAD,OMIM      | 5996 | GAD      | 22900 | GAD           | 100507436 | GAD      |
| 3158 | GAD           | 6014 | GAD      | 22914 | GAD           |           |          |
| 3162 | GAD           | 6147 | OMIM     | 22943 | OMIM          |           |          |
| 3251 | GAD           | 6176 | GAD      | 23118 | GAD           |           |          |
| 3267 | GAD           | 6280 | OMIM     | 23228 | GAD           |           |          |
| 3273 | OMIM          | 6288 | GAD,OMIM | 23274 | GAD           |           |          |

**Supplement Table S6** The overlapped 7 targets of GSZ formula, RA-related disease genes and drug targets. 7 targets were found to be in common in comparison between the 1,327 GSZ formula targets with the 79 targets of FDA 30 approved RA drugs.

| <b>target name</b>                              | <b>abbreviation</b> |
|-------------------------------------------------|---------------------|
| conserved helix-loop-helix ubiquitous kinase    | CHUK                |
| dihydroorotate dehydrogenase                    | DHODH               |
| nuclear receptor subfamily 3, group C, member 1 | NR3C1               |
| peroxisome proliferator-activated receptor      | PPARG               |
| prostaglandin-endoperoxide synthase 2           | PTGS2               |
| tumor necrosis factor                           | TNF                 |
| phospholipase A2, group IIA                     | PLA2G2A             |

**Supplementary Table S7** Genes directly interacted with p50. In the network generated by Cytoscape, p50, defined as both RA disease gene and GSZ target, directly interacted with 7 genes.

| <b>target name</b>                                                                  | <b>abbreviation</b> |
|-------------------------------------------------------------------------------------|---------------------|
| signal transducer and activator of transcription 3                                  | HIES                |
| nuclear factor of kappa light polypeptide gene enhancer in B-cells inhibitor, alpha | NFKBI               |
| ubiquitin-conjugating enzyme E2D 3                                                  | UBCH5C              |
| poly (ADP-ribose) polymerase 1                                                      | pADPRT-1            |
| protein phosphatase 4, catalytic subunit                                            | PPX                 |
| E74-like factor 1 (ets domain transcription factor)                                 | ELF1                |
| receptor (TNFRSF)-interacting serine-threonine kinase 1                             | RIP1                |

**Supplementary Table S8** Disease genes interacted with either MLRW or HLA-DRB1. In the network generated by Cytoscape, two formula targets MLRW and HLA-DRB1 directly or indirectly interact with five disease genes.

| <b>target name</b>                                     | <b>abbreviation</b> |
|--------------------------------------------------------|---------------------|
| major histocompatibility complex, class II, DR beta 5  | HLA-DRB5            |
| major histocompatibility complex, class II, DM beta    | HLA-DMB, RING7      |
| major histocompatibility complex, class II, DM alpha   | HLA-DMA, RING6      |
| major histocompatibility complex, class II, DP alpha 1 | HLA-DPA1, PLT1      |
| major histocompatibility complex, class II, DP beta 1  | HLA-DPB             |

**Supplement Table S9** 7 disease genes directly interact with MSF. In the network generated by Cytoscape, MSF directly interacted with 7 disease genes.

| <b>target name</b>                          | <b>abbreviation</b> |
|---------------------------------------------|---------------------|
| matrix metalloproteinase 3                  | STR1                |
| caspase recruitment domain family, member 8 | TUCAN               |
| chemokine (C-X-C motif) ligand 12           | TPAR1               |
| HtrA serine peptidase 1                     | PRSS11              |
| integrin, alpha V                           | VTNR                |
| matrix metalloproteinase 2                  | TBE-1               |
| phospholipase A2, group IIA                 | sPLA2               |

**Supplementary Table S10** Clinical information of 10 RA patients. Gender, stage of disease, serum levels of RF, ESR and CRP, and some other parameters of every patient were recorded and listed in the table.

| patient | SEX | AGE (y) | WEIGHT (kg) | HIGH (m) | BMI  | Stage | RF T0 (IU/ml) | RF T1 (IU/ml) | RF T2 (IU/ml) | RF T3 (IU/ml) | CRP T0 (mg/L) | CRP T1 (mg/L) | CRP T2 (mg/L) | CRP T3 (mg/L) | ESR T0 (mm/h) | ESR T1 (mm/h) | ESR T2 (mm/h) | ESR T3 (mm/h) |
|---------|-----|---------|-------------|----------|------|-------|---------------|---------------|---------------|---------------|---------------|---------------|---------------|---------------|---------------|---------------|---------------|---------------|
| P1      | F   | 63      | 62          | 1.65     | 22.8 | II    | 233.5         | 17            | -             | -             | 4.3           | 4.8           | -             | -             | 15            | 4.8           | -             | -             |
| P2      | F   | 46      | 56          | 1.66     | 20.3 | II    | 82.5          | 131.8         | 112.5         | 48.5          | 1             | 1.4           | 0.9           | 1.7           | 28            | 23            | 29            | 24            |
| P3      | M   | 65      | 60          | 1.75     | 19.6 | II    | 207           | 30            | 25.7          | 21.3          | 33            | -             | -             | -             | 43            | 43            | -             | -             |
| P4      | M   | 59      | 61          | 1.72     | 20.6 | II    | 31.5          | 53.2          | -             | -             | 27            | 42.73         | -             | -             | 18            | 30            | -             | -             |
| P5      | F   | 53      | 56          | 1.62     | 21.3 | III   | 65            | 19.3          | -             | -             | 2.4           | 1.9           | -             | -             | 46            | 90            | -             | -             |
| P6      | F   | 67      | 53          | 1.6      | 20.7 | II    | 443           | 285           | -             | -             | -             | -             | -             | -             | 68            | -             | -             | -             |
| P7      | F   | 71      | 63          | 1.68     | 22.3 | II    | 541           | 82.6          | 23.8          | -             | -             | 40            | 5             | -             | 96            | 17            | 19            | -             |
| P8      | F   | 29      | 50          | 1.62     | 19.1 | II    | 71.8          | 63.7          | -             | -             | 3             | 1             | -             | -             | 7             | 6             | -             | -             |
| P9      | F   | 62      | 47          | 1.57     | 19.1 | II    | 311           | 166.1         | -             | -             | 2.3           | 3             | -             | -             | 13            | -             | -             | -             |
| P10     | F   | 52      | 52.5        | 1.67     | 18.8 | I     | 74.9          |               | -             | -             | -             | 3.26          | -             | -             | 35            | 26            | -             | -             |

**Supplement Table 11** 1080 microarrays collected from GEO database. 1080 microarrays were collected from GEO database and then classified as 174 normal samples (WT), 312 RA disease samples (RA\_ONLY), 551 RA treatment samples (RA\_TREAT) and 42 other RA related samples (RA\_OTHER).

| GSM ID     | Group | GSE ID   | GPL ID  | GSM ID      | Group    | GSE ID   | GPL ID  |
|------------|-------|----------|---------|-------------|----------|----------|---------|
| GSM 253285 | WT    | GSE10024 | GPL96   | GSM 1320250 | RA_TREAT | GSE54629 | GPL6244 |
| GSM 253286 | WT    | GSE10024 | GPL96   | GSM 1320251 | RA_TREAT | GSE54629 | GPL6244 |
| GSM 265436 | WT    | GSE10500 | GPL8300 | GSM 1320252 | RA_TREAT | GSE54629 | GPL6244 |
| GSM 265439 | WT    | GSE10500 | GPL8300 | GSM 1320253 | RA_TREAT | GSE54629 | GPL6244 |
| GSM 265445 | WT    | GSE10500 | GPL8300 | GSM 1320254 | RA_TREAT | GSE54629 | GPL6244 |
| GSM 302859 | WT    | GSE12021 | GPL96   | GSM 1320255 | RA_TREAT | GSE54629 | GPL6244 |
| GSM 302864 | WT    | GSE12021 | GPL96   | GSM 1320256 | RA_TREAT | GSE54629 | GPL6244 |
| GSM 302866 | WT    | GSE12021 | GPL96   | GSM 1320257 | RA_TREAT | GSE54629 | GPL6244 |
| GSM 302870 | WT    | GSE12021 | GPL96   | GSM 1320258 | RA_TREAT | GSE54629 | GPL6244 |
| GSM 303522 | WT    | GSE12021 | GPL96   | GSM 1320259 | RA_TREAT | GSE54629 | GPL6244 |
| GSM 303523 | WT    | GSE12021 | GPL96   | GSM 1320260 | RA_TREAT | GSE54629 | GPL6244 |
| GSM 303525 | WT    | GSE12021 | GPL96   | GSM 1320261 | RA_TREAT | GSE54629 | GPL6244 |
| GSM 303531 | WT    | GSE12021 | GPL96   | GSM 1320262 | RA_TREAT | GSE54629 | GPL6244 |
| GSM 303533 | WT    | GSE12021 | GPL96   | GSM 1320263 | RA_TREAT | GSE54629 | GPL6244 |
| GSM 389705 | WT    | GSE15573 | GPL6102 | GSM 1320264 | RA_TREAT | GSE54629 | GPL6244 |
| GSM 389707 | WT    | GSE15573 | GPL6102 | GSM 1320265 | RA_TREAT | GSE54629 | GPL6244 |
| GSM 389709 | WT    | GSE15573 | GPL6102 | GSM 1320266 | RA_TREAT | GSE54629 | GPL6244 |
| GSM 389710 | WT    | GSE15573 | GPL6102 | GSM 1320267 | RA_TREAT | GSE54629 | GPL6244 |
| GSM 389712 | WT    | GSE15573 | GPL6102 | GSM 1320268 | RA_TREAT | GSE54629 | GPL6244 |
| GSM 389713 | WT    | GSE15573 | GPL6102 | GSM 1320269 | RA_TREAT | GSE54629 | GPL6244 |
| GSM 389715 | WT    | GSE15573 | GPL6102 | GSM 1320270 | RA_TREAT | GSE54629 | GPL6244 |
| GSM 389718 | WT    | GSE15573 | GPL6102 | GSM 1320271 | RA_TREAT | GSE54629 | GPL6244 |
| GSM 389720 | WT    | GSE15573 | GPL6102 | GSM 1320272 | RA_TREAT | GSE54629 | GPL6244 |
| GSM 389723 | WT    | GSE15573 | GPL6102 | GSM 1320273 | RA_TREAT | GSE54629 | GPL6244 |
| GSM 389725 | WT    | GSE15573 | GPL6102 | GSM 1320274 | RA_TREAT | GSE54629 | GPL6244 |
| GSM 389728 | WT    | GSE15573 | GPL6102 | GSM 1320275 | RA_TREAT | GSE54629 | GPL6244 |
| GSM 389729 | WT    | GSE15573 | GPL6102 | GSM 1320276 | RA_TREAT | GSE54629 | GPL6244 |
| GSM 389732 | WT    | GSE15573 | GPL6102 | GSM 1320277 | RA_TREAT | GSE54629 | GPL6244 |
| GSM 389734 | WT    | GSE15573 | GPL6102 | GSM 1320278 | RA_TREAT | GSE54629 | GPL6244 |
| GSM 34379  | WT    | GSE1919  | GPL91   | GSM 1320279 | RA_TREAT | GSE54629 | GPL6244 |
| GSM 34383  | WT    | GSE1919  | GPL91   | GSM 1320280 | RA_TREAT | GSE54629 | GPL6244 |
| GSM 34385  | WT    | GSE1919  | GPL91   | GSM 1320281 | RA_TREAT | GSE54629 | GPL6244 |
| GSM 34388  | WT    | GSE1919  | GPL91   | GSM 1320282 | RA_TREAT | GSE54629 | GPL6244 |
| GSM 34391  | WT    | GSE1919  | GPL91   | GSM 1320283 | RA_TREAT | GSE54629 | GPL6244 |
| GSM 546086 | WT    | GSE21959 | GPL4133 | GSM 1320284 | RA_TREAT | GSE54629 | GPL6244 |
| GSM 546087 | WT    | GSE21959 | GPL4133 | GSM 1320285 | RA_TREAT | GSE54629 | GPL6244 |
| GSM 546088 | WT    | GSE21959 | GPL4133 | GSM 1320286 | RA_TREAT | GSE54629 | GPL6244 |
| GSM 546089 | WT    | GSE21959 | GPL4133 | GSM 1320287 | RA_TREAT | GSE54629 | GPL6244 |
| GSM 546090 | WT    | GSE21959 | GPL4133 | GSM 1320288 | RA_TREAT | GSE54629 | GPL6244 |
| GSM 546091 | WT    | GSE21959 | GPL4133 | GSM 1320289 | RA_TREAT | GSE54629 | GPL6244 |
| GSM 546098 | WT    | GSE21959 | GPL4133 | GSM 1332221 | RA_TREAT | GSE55235 | GPL96   |
| GSM 546099 | WT    | GSE21959 | GPL4133 | GSM 1332222 | RA_TREAT | GSE55235 | GPL96   |
| GSM 546100 | WT    | GSE21959 | GPL4133 | GSM 1332223 | RA_TREAT | GSE55235 | GPL96   |
| GSM 546101 | WT    | GSE21959 | GPL4133 | GSM 1332224 | RA_TREAT | GSE55235 | GPL96   |



|            |    |          |          |            |          |          |          |
|------------|----|----------|----------|------------|----------|----------|----------|
| GSM546102  | WT | GSE21959 | GPL4133  | GSM1332225 | RA_TREAT | GSE55235 | GPL96    |
| GSM546103  | WT | GSE21959 | GPL4133  | GSM1332226 | RA_TREAT | GSE55235 | GPL96    |
| GSM546104  | WT | GSE21959 | GPL4133  | GSM1332227 | RA_TREAT | GSE55235 | GPL96    |
| GSM546105  | WT | GSE21959 | GPL4133  | GSM1332228 | RA_TREAT | GSE55235 | GPL96    |
| GSM546118  | WT | GSE21959 | GPL4133  | GSM1332229 | RA_TREAT | GSE55235 | GPL96    |
| GSM546119  | WT | GSE21959 | GPL4133  | GSM1332230 | RA_TREAT | GSE55235 | GPL96    |
| GSM546120  | WT | GSE21959 | GPL4133  | GSM1337314 | RA_TREAT | GSE55457 | GPL96    |
| GSM546121  | WT | GSE21959 | GPL4133  | GSM1337315 | RA_TREAT | GSE55457 | GPL96    |
| GSM677348  | WT | GSE27390 | GPL570   | GSM1337316 | RA_TREAT | GSE55457 | GPL96    |
| GSM677349  | WT | GSE27390 | GPL570   | GSM1337317 | RA_TREAT | GSE55457 | GPL96    |
| GSM677350  | WT | GSE27390 | GPL570   | GSM1337318 | RA_TREAT | GSE55457 | GPL96    |
| GSM677351  | WT | GSE27390 | GPL570   | GSM1337319 | RA_TREAT | GSE55457 | GPL96    |
| GSM677352  | WT | GSE27390 | GPL570   | GSM1337320 | RA_TREAT | GSE55457 | GPL96    |
| GSM677353  | WT | GSE27390 | GPL570   | GSM1337321 | RA_TREAT | GSE55457 | GPL96    |
| GSM677354  | WT | GSE27390 | GPL570   | GSM1337322 | RA_TREAT | GSE55457 | GPL96    |
| GSM677355  | WT | GSE27390 | GPL570   | GSM1337323 | RA_TREAT | GSE55457 | GPL96    |
| GSM677356  | WT | GSE27390 | GPL570   | GSM1337324 | RA_TREAT | GSE55457 | GPL96    |
| GSM677357  | WT | GSE27390 | GPL570   | GSM1337325 | RA_TREAT | GSE55457 | GPL96    |
| GSM737470  | WT | GSE29746 | GPL4133  | GSM1337326 | RA_TREAT | GSE55457 | GPL96    |
| GSM737471  | WT | GSE29746 | GPL4133  | GSM1339618 | RA_TREAT | GSE55584 | GPL96    |
| GSM737472  | WT | GSE29746 | GPL4133  | GSM1339619 | RA_TREAT | GSE55584 | GPL96    |
| GSM737473  | WT | GSE29746 | GPL4133  | GSM1339620 | RA_TREAT | GSE55584 | GPL96    |
| GSM737474  | WT | GSE29746 | GPL4133  | GSM1339621 | RA_TREAT | GSE55584 | GPL96    |
| GSM737475  | WT | GSE29746 | GPL4133  | GSM1339622 | RA_TREAT | GSE55584 | GPL96    |
| GSM737476  | WT | GSE29746 | GPL4133  | GSM1339623 | RA_TREAT | GSE55584 | GPL96    |
| GSM737477  | WT | GSE29746 | GPL4133  | GSM1339624 | RA_TREAT | GSE55584 | GPL96    |
| GSM737478  | WT | GSE29746 | GPL4133  | GSM1339625 | RA_TREAT | GSE55584 | GPL96    |
| GSM737479  | WT | GSE29746 | GPL4133  | GSM1339626 | RA_TREAT | GSE55584 | GPL96    |
| GSM737480  | WT | GSE29746 | GPL4133  | GSM1339627 | RA_TREAT | GSE55584 | GPL96    |
| GSM1100843 | WT | GSE45291 | GPL13158 | GSM1381430 | RA_TREAT | GSE57386 | GPL13158 |
| GSM1100844 | WT | GSE45291 | GPL13158 | GSM1381431 | RA_TREAT | GSE57386 | GPL13158 |
| GSM1100845 | WT | GSE45291 | GPL13158 | GSM1381432 | RA_TREAT | GSE57386 | GPL13158 |
| GSM1100846 | WT | GSE45291 | GPL13158 | GSM1381433 | RA_TREAT | GSE57386 | GPL13158 |
| GSM1100847 | WT | GSE45291 | GPL13158 | GSM1381610 | RA_TREAT | GSE57383 | GPL13158 |
| GSM1100848 | WT | GSE45291 | GPL13158 | GSM1381611 | RA_TREAT | GSE57383 | GPL13158 |
| GSM1100849 | WT | GSE45291 | GPL13158 | GSM1381612 | RA_TREAT | GSE57383 | GPL13158 |
| GSM1100850 | WT | GSE45291 | GPL13158 | GSM1381613 | RA_TREAT | GSE57383 | GPL13158 |
| GSM1100851 | WT | GSE45291 | GPL13158 | GSM1381614 | RA_TREAT | GSE57383 | GPL13158 |
| GSM1100852 | WT | GSE45291 | GPL13158 | GSM1381615 | RA_TREAT | GSE57383 | GPL13158 |
| GSM1100853 | WT | GSE45291 | GPL13158 | GSM1381617 | RA_TREAT | GSE57383 | GPL13158 |
| GSM1100854 | WT | GSE45291 | GPL13158 | GSM1381618 | RA_TREAT | GSE57383 | GPL13158 |
| GSM1100855 | WT | GSE45291 | GPL13158 | GSM1381619 | RA_TREAT | GSE57383 | GPL13158 |
| GSM1100856 | WT | GSE45291 | GPL13158 | GSM1381622 | RA_TREAT | GSE57383 | GPL13158 |
| GSM1100857 | WT | GSE45291 | GPL13158 | GSM1381623 | RA_TREAT | GSE57383 | GPL13158 |
| GSM1100858 | WT | GSE45291 | GPL13158 | GSM1381625 | RA_TREAT | GSE57383 | GPL13158 |
| GSM1100859 | WT | GSE45291 | GPL13158 | GSM1381626 | RA_TREAT | GSE57383 | GPL13158 |
| GSM1100860 | WT | GSE45291 | GPL13158 | GSM1381627 | RA_TREAT | GSE57383 | GPL13158 |

|            |    |          |          |            |          |          |          |
|------------|----|----------|----------|------------|----------|----------|----------|
| GSM1100861 | WT | GSE45291 | GPL13158 | GSM1381628 | RA_TREAT | GSE57383 | GPL13158 |
| GSM1100862 | WT | GSE45291 | GPL13158 | GSM1381630 | RA_TREAT | GSE57383 | GPL13158 |
| GSM101869  | WT | GSE4588  | GPL570   | GSM1381631 | RA_TREAT | GSE57383 | GPL13158 |
| GSM101870  | WT | GSE4588  | GPL570   | GSM1381633 | RA_TREAT | GSE57383 | GPL13158 |
| GSM101871  | WT | GSE4588  | GPL570   | GSM1382133 | RA_TREAT | GSE57405 | GPL13158 |
| GSM101872  | WT | GSE4588  | GPL570   | GSM1382134 | RA_TREAT | GSE57405 | GPL13158 |
| GSM101873  | WT | GSE4588  | GPL570   | GSM1382135 | RA_TREAT | GSE57405 | GPL13158 |
| GSM101874  | WT | GSE4588  | GPL570   | GSM1382136 | RA_TREAT | GSE57405 | GPL13158 |
| GSM101875  | WT | GSE4588  | GPL570   | GSM1382137 | RA_TREAT | GSE57405 | GPL13158 |
| GSM101876  | WT | GSE4588  | GPL570   | GSM1382138 | RA_TREAT | GSE57405 | GPL13158 |
| GSM101877  | WT | GSE4588  | GPL570   | GSM1382139 | RA_TREAT | GSE57405 | GPL13158 |
| GSM101878  | WT | GSE4588  | GPL570   | GSM1382140 | RA_TREAT | GSE57405 | GPL13158 |
| GSM101962  | WT | GSE4588  | GPL570   | GSM1382141 | RA_TREAT | GSE57405 | GPL13158 |
| GSM101963  | WT | GSE4588  | GPL570   | GSM1382142 | RA_TREAT | GSE57405 | GPL13158 |
| GSM101964  | WT | GSE4588  | GPL570   | GSM1382143 | RA_TREAT | GSE57405 | GPL13158 |
| GSM101965  | WT | GSE4588  | GPL570   | GSM1382144 | RA_TREAT | GSE57405 | GPL13158 |
| GSM101966  | WT | GSE4588  | GPL570   | GSM1382145 | RA_TREAT | GSE57405 | GPL13158 |
| GSM101967  | WT | GSE4588  | GPL570   | GSM1382146 | RA_TREAT | GSE57405 | GPL13158 |
| GSM101968  | WT | GSE4588  | GPL570   | GSM1382147 | RA_TREAT | GSE57405 | GPL13158 |
| GSM101969  | WT | GSE4588  | GPL570   | GSM1382148 | RA_TREAT | GSE57405 | GPL13158 |
| GSM101970  | WT | GSE4588  | GPL570   | GSM1382149 | RA_TREAT | GSE57405 | GPL13158 |
| GSM1202491 | WT | GSE49604 | GPL8432  | GSM1382150 | RA_TREAT | GSE57405 | GPL13158 |
| GSM1202492 | WT | GSE49604 | GPL8432  | GSM1419699 | RA_TREAT | GSE58795 | GPL10379 |
| GSM1332201 | WT | GSE55235 | GPL96    | GSM1419700 | RA_TREAT | GSE58795 | GPL10379 |
| GSM1332202 | WT | GSE55235 | GPL96    | GSM1419701 | RA_TREAT | GSE58795 | GPL10379 |
| GSM1332203 | WT | GSE55235 | GPL96    | GSM1419702 | RA_TREAT | GSE58795 | GPL10379 |
| GSM1332204 | WT | GSE55235 | GPL96    | GSM1419703 | RA_TREAT | GSE58795 | GPL10379 |
| GSM1332205 | WT | GSE55235 | GPL96    | GSM1419704 | RA_TREAT | GSE58795 | GPL10379 |
| GSM1332206 | WT | GSE55235 | GPL96    | GSM1419705 | RA_TREAT | GSE58795 | GPL10379 |
| GSM1332207 | WT | GSE55235 | GPL96    | GSM1419706 | RA_TREAT | GSE58795 | GPL10379 |
| GSM1332208 | WT | GSE55235 | GPL96    | GSM1419707 | RA_TREAT | GSE58795 | GPL10379 |
| GSM1332209 | WT | GSE55235 | GPL96    | GSM1419708 | RA_TREAT | GSE58795 | GPL10379 |
| GSM1332210 | WT | GSE55235 | GPL96    | GSM1419709 | RA_TREAT | GSE58795 | GPL10379 |
| GSM1337304 | WT | GSE55457 | GPL96    | GSM1419710 | RA_TREAT | GSE58795 | GPL10379 |
| GSM1337305 | WT | GSE55457 | GPL96    | GSM1419711 | RA_TREAT | GSE58795 | GPL10379 |
| GSM1337306 | WT | GSE55457 | GPL96    | GSM1419712 | RA_TREAT | GSE58795 | GPL10379 |
| GSM1337307 | WT | GSE55457 | GPL96    | GSM1419713 | RA_TREAT | GSE58795 | GPL10379 |
| GSM1337308 | WT | GSE55457 | GPL96    | GSM1419714 | RA_TREAT | GSE58795 | GPL10379 |
| GSM1337309 | WT | GSE55457 | GPL96    | GSM1419715 | RA_TREAT | GSE58795 | GPL10379 |
| GSM1337310 | WT | GSE55457 | GPL96    | GSM1419716 | RA_TREAT | GSE58795 | GPL10379 |
| GSM1337311 | WT | GSE55457 | GPL96    | GSM1419717 | RA_TREAT | GSE58795 | GPL10379 |
| GSM1337312 | WT | GSE55457 | GPL96    | GSM1419718 | RA_TREAT | GSE58795 | GPL10379 |
| GSM1337313 | WT | GSE55457 | GPL96    | GSM1419719 | RA_TREAT | GSE58795 | GPL10379 |
| GSM1381524 | WT | GSE57383 | GPL13158 | GSM1419720 | RA_TREAT | GSE58795 | GPL10379 |
| GSM1381525 | WT | GSE57383 | GPL13158 | GSM1419721 | RA_TREAT | GSE58795 | GPL10379 |
| GSM1381526 | WT | GSE57383 | GPL13158 | GSM1419722 | RA_TREAT | GSE58795 | GPL10379 |
| GSM1381527 | WT | GSE57383 | GPL13158 | GSM1419723 | RA_TREAT | GSE58795 | GPL10379 |

|            |          |          |          |            |          |          |          |
|------------|----------|----------|----------|------------|----------|----------|----------|
| GSM1381528 | WT       | GSE57383 | GPL13158 | GSM1419724 | RA_TREAT | GSE58795 | GPL10379 |
| GSM1381529 | WT       | GSE57383 | GPL13158 | GSM1419725 | RA_TREAT | GSE58795 | GPL10379 |
| GSM1381530 | WT       | GSE57383 | GPL13158 | GSM1419726 | RA_TREAT | GSE58795 | GPL10379 |
| GSM1381531 | WT       | GSE57383 | GPL13158 | GSM1419727 | RA_TREAT | GSE58795 | GPL10379 |
| GSM1381532 | WT       | GSE57383 | GPL13158 | GSM1419728 | RA_TREAT | GSE58795 | GPL10379 |
| GSM1381533 | WT       | GSE57383 | GPL13158 | GSM1419729 | RA_TREAT | GSE58795 | GPL10379 |
| GSM1381534 | WT       | GSE57383 | GPL13158 | GSM1419730 | RA_TREAT | GSE58795 | GPL10379 |
| GSM1381535 | WT       | GSE57383 | GPL13158 | GSM1419731 | RA_TREAT | GSE58795 | GPL10379 |
| GSM1381536 | WT       | GSE57383 | GPL13158 | GSM1419732 | RA_TREAT | GSE58795 | GPL10379 |
| GSM1381537 | WT       | GSE57383 | GPL13158 | GSM1419733 | RA_TREAT | GSE58795 | GPL10379 |
| GSM1381538 | WT       | GSE57383 | GPL13158 | GSM1419734 | RA_TREAT | GSE58795 | GPL10379 |
| GSM1381539 | WT       | GSE57383 | GPL13158 | GSM1419735 | RA_TREAT | GSE58795 | GPL10379 |
| GSM1381540 | WT       | GSE57383 | GPL13158 | GSM1419736 | RA_TREAT | GSE58795 | GPL10379 |
| GSM1381541 | WT       | GSE57383 | GPL13158 | GSM1419737 | RA_TREAT | GSE58795 | GPL10379 |
| GSM1381542 | WT       | GSE57383 | GPL13158 | GSM1419738 | RA_TREAT | GSE58795 | GPL10379 |
| GSM1382105 | WT       | GSE57405 | GPL13158 | GSM1419739 | RA_TREAT | GSE58795 | GPL10379 |
| GSM1382106 | WT       | GSE57405 | GPL13158 | GSM1419740 | RA_TREAT | GSE58795 | GPL10379 |
| GSM1382107 | WT       | GSE57405 | GPL13158 | GSM1419741 | RA_TREAT | GSE58795 | GPL10379 |
| GSM1382108 | WT       | GSE57405 | GPL13158 | GSM1419742 | RA_TREAT | GSE58795 | GPL10379 |
| GSM1382109 | WT       | GSE57405 | GPL13158 | GSM1419743 | RA_TREAT | GSE58795 | GPL10379 |
| GSM1382110 | WT       | GSE57405 | GPL13158 | GSM1419744 | RA_TREAT | GSE58795 | GPL10379 |
| GSM1382111 | WT       | GSE57405 | GPL13158 | GSM1419745 | RA_TREAT | GSE58795 | GPL10379 |
| GSM1382112 | WT       | GSE57405 | GPL13158 | GSM1419746 | RA_TREAT | GSE58795 | GPL10379 |
| GSM1382113 | WT       | GSE57405 | GPL13158 | GSM1419747 | RA_TREAT | GSE58795 | GPL10379 |
| GSM1382114 | WT       | GSE57405 | GPL13158 | GSM1419748 | RA_TREAT | GSE58795 | GPL10379 |
| GSM1382115 | WT       | GSE57405 | GPL13158 | GSM1419749 | RA_TREAT | GSE58795 | GPL10379 |
| GSM1382116 | WT       | GSE57405 | GPL13158 | GSM1419750 | RA_TREAT | GSE58795 | GPL10379 |
| GSM1382117 | WT       | GSE57405 | GPL13158 | GSM1419751 | RA_TREAT | GSE58795 | GPL10379 |
| GSM1382118 | WT       | GSE57405 | GPL13158 | GSM1419752 | RA_TREAT | GSE58795 | GPL10379 |
| GSM1382119 | WT       | GSE57405 | GPL13158 | GSM1419753 | RA_TREAT | GSE58795 | GPL10379 |
| GSM1382120 | WT       | GSE57405 | GPL13158 | GSM1419754 | RA_TREAT | GSE58795 | GPL10379 |
| GSM1382121 | WT       | GSE57405 | GPL13158 | GSM1419755 | RA_TREAT | GSE58795 | GPL10379 |
| GSM1382122 | WT       | GSE57405 | GPL13158 | GSM1419756 | RA_TREAT | GSE58795 | GPL10379 |
| GSM1382123 | WT       | GSE57405 | GPL13158 | GSM1419757 | RA_TREAT | GSE58795 | GPL10379 |
| GSM119289  | WT       | GSE7524  | GPL96    | GSM119293  | RA_TREAT | GSE7524  | GPL96    |
| GSM119290  | WT       | GSE7524  | GPL96    | GSM119294  | RA_TREAT | GSE7524  | GPL96    |
| GSM265020  | RA_TREAT | GSE10500 | GPL8300  | GSM185526  | RA_TREAT | GSE7669  | GPL8300  |
| GSM265036  | RA_TREAT | GSE10500 | GPL8300  | GSM185527  | RA_TREAT | GSE7669  | GPL8300  |
| GSM265361  | RA_TREAT | GSE10500 | GPL8300  | GSM185528  | RA_TREAT | GSE7669  | GPL8300  |
| GSM265363  | RA_TREAT | GSE10500 | GPL8300  | GSM185529  | RA_TREAT | GSE7669  | GPL8300  |
| GSM265366  | RA_TREAT | GSE10500 | GPL8300  | GSM185530  | RA_TREAT | GSE7669  | GPL8300  |
| GSM302872  | RA_TREAT | GSE12021 | GPL96    | GSM11947   | RA_TREAT | GSE766   | GPL8300  |
| GSM302882  | RA_TREAT | GSE12021 | GPL96    | GSM11954   | RA_TREAT | GSE766   | GPL8300  |
| GSM302896  | RA_TREAT | GSE12021 | GPL96    | GSM11955   | RA_TREAT | GSE766   | GPL8300  |
| GSM302900  | RA_TREAT | GSE12021 | GPL96    | GSM11956   | RA_TREAT | GSE766   | GPL8300  |
| GSM302924  | RA_TREAT | GSE12021 | GPL96    | GSM11957   | RA_TREAT | GSE766   | GPL8300  |
| GSM302927  | RA_TREAT | GSE12021 | GPL96    | GSM11958   | RA_TREAT | GSE766   | GPL8300  |

|           |          |          |        |            |          |          |         |
|-----------|----------|----------|--------|------------|----------|----------|---------|
| GSM302933 | RA_TREAT | GSE12021 | GPL96  | GSM253283  | RA_OTHER | GSE10024 | GPL96   |
| GSM302943 | RA_TREAT | GSE12021 | GPL96  | GSM253284  | RA_OTHER | GSE10024 | GPL96   |
| GSM303364 | RA_TREAT | GSE12021 | GPL96  | GSM566729  | RA_OTHER | GSE22956 | GPL6947 |
| GSM303366 | RA_TREAT | GSE12021 | GPL96  | GSM566730  | RA_OTHER | GSE22956 | GPL6947 |
| GSM303368 | RA_TREAT | GSE12021 | GPL96  | GSM566732  | RA_OTHER | GSE22956 | GPL6947 |
| GSM303520 | RA_TREAT | GSE12021 | GPL96  | GSM566733  | RA_OTHER | GSE22956 | GPL6947 |
| GSM322613 | RA_TREAT | GSE12860 | GPL96  | GSM566735  | RA_OTHER | GSE22956 | GPL6947 |
| GSM322614 | RA_TREAT | GSE12860 | GPL96  | GSM566736  | RA_OTHER | GSE22956 | GPL6947 |
| GSM322615 | RA_TREAT | GSE12860 | GPL96  | GSM566738  | RA_OTHER | GSE22956 | GPL6947 |
| GSM322616 | RA_TREAT | GSE12860 | GPL96  | GSM566739  | RA_OTHER | GSE22956 | GPL6947 |
| GSM322617 | RA_TREAT | GSE12860 | GPL96  | GSM786584  | RA_OTHER | GSE31685 | GPL6244 |
| GSM322618 | RA_TREAT | GSE12860 | GPL96  | GSM786585  | RA_OTHER | GSE31685 | GPL6244 |
| GSM322619 | RA_TREAT | GSE12860 | GPL96  | GSM786586  | RA_OTHER | GSE31685 | GPL6244 |
| GSM322620 | RA_TREAT | GSE12860 | GPL96  | GSM786587  | RA_OTHER | GSE31685 | GPL6244 |
| GSM322621 | RA_TREAT | GSE12860 | GPL96  | GSM786588  | RA_OTHER | GSE31685 | GPL6244 |
| GSM322622 | RA_TREAT | GSE12860 | GPL96  | GSM786589  | RA_OTHER | GSE31685 | GPL6244 |
| GSM322623 | RA_TREAT | GSE12860 | GPL96  | GSM1111504 | RA_OTHER | GSE45665 | GPL570  |
| GSM322624 | RA_TREAT | GSE12860 | GPL96  | GSM1111505 | RA_OTHER | GSE45665 | GPL570  |
| GSM322625 | RA_TREAT | GSE12860 | GPL96  | GSM1111506 | RA_OTHER | GSE45665 | GPL570  |
| GSM322626 | RA_TREAT | GSE12860 | GPL96  | GSM1111507 | RA_OTHER | GSE45665 | GPL570  |
| GSM322627 | RA_TREAT | GSE12860 | GPL96  | GSM1111508 | RA_OTHER | GSE45665 | GPL570  |
| GSM322628 | RA_TREAT | GSE12860 | GPL96  | GSM1111509 | RA_OTHER | GSE45665 | GPL570  |
| GSM347841 | RA_TREAT | GSE13837 | GPL570 | GSM1111510 | RA_OTHER | GSE45665 | GPL570  |
| GSM347842 | RA_TREAT | GSE13837 | GPL570 | GSM1111511 | RA_OTHER | GSE45665 | GPL570  |
| GSM347843 | RA_TREAT | GSE13837 | GPL570 | GSM101879  | RA_OTHER | GSE4588  | GPL570  |
| GSM347844 | RA_TREAT | GSE13837 | GPL570 | GSM101880  | RA_OTHER | GSE4588  | GPL570  |
| GSM348017 | RA_TREAT | GSE13837 | GPL570 | GSM101881  | RA_OTHER | GSE4588  | GPL570  |
| GSM348018 | RA_TREAT | GSE13837 | GPL570 | GSM101882  | RA_OTHER | GSE4588  | GPL570  |
| GSM348020 | RA_TREAT | GSE13837 | GPL570 | GSM101883  | RA_OTHER | GSE4588  | GPL570  |
| GSM348022 | RA_TREAT | GSE13837 | GPL570 | GSM101884  | RA_OTHER | GSE4588  | GPL570  |
| GSM348024 | RA_TREAT | GSE13837 | GPL570 | GSM101885  | RA_OTHER | GSE4588  | GPL570  |
| GSM348027 | RA_TREAT | GSE13837 | GPL570 | GSM101886  | RA_OTHER | GSE4588  | GPL570  |
| GSM348028 | RA_TREAT | GSE13837 | GPL570 | GSM102703  | RA_OTHER | GSE4588  | GPL570  |
| GSM348029 | RA_TREAT | GSE13837 | GPL570 | GSM102704  | RA_OTHER | GSE4588  | GPL570  |
| GSM348031 | RA_TREAT | GSE13837 | GPL570 | GSM102705  | RA_OTHER | GSE4588  | GPL570  |
| GSM348034 | RA_TREAT | GSE13837 | GPL570 | GSM102706  | RA_OTHER | GSE4588  | GPL570  |
| GSM348035 | RA_TREAT | GSE13837 | GPL570 | GSM102707  | RA_OTHER | GSE4588  | GPL570  |
| GSM348036 | RA_TREAT | GSE13837 | GPL570 | GSM102708  | RA_OTHER | GSE4588  | GPL570  |
| GSM381194 | RA_TREAT | GSE15258 | GPL570 | GSM102709  | RA_OTHER | GSE4588  | GPL570  |
| GSM381195 | RA_TREAT | GSE15258 | GPL570 | GSM1562203 | RA_OTHER | GSE63995 | GPL570  |
| GSM381196 | RA_TREAT | GSE15258 | GPL570 | GSM1562205 | RA_OTHER | GSE63995 | GPL570  |
| GSM381197 | RA_TREAT | GSE15258 | GPL570 | GSM1562207 | RA_OTHER | GSE63995 | GPL570  |
| GSM381198 | RA_TREAT | GSE15258 | GPL570 | GSM1562209 | RA_OTHER | GSE63995 | GPL570  |
| GSM381199 | RA_TREAT | GSE15258 | GPL570 | GSM253287  | RA_ONLY  | GSE10024 | GPL96   |
| GSM381200 | RA_TREAT | GSE15258 | GPL570 | GSM253288  | RA_ONLY  | GSE10024 | GPL96   |
| GSM381201 | RA_TREAT | GSE15258 | GPL570 | GSM322609  | RA_ONLY  | GSE12860 | GPL96   |
| GSM381202 | RA_TREAT | GSE15258 | GPL570 | GSM322610  | RA_ONLY  | GSE12860 | GPL96   |



|           |          |          |        |           |         |          |         |
|-----------|----------|----------|--------|-----------|---------|----------|---------|
| GSM381250 | RA_TREAT | GSE15258 | GPL570 | GSM566728 | RA_ONLY | GSE22956 | GPL6947 |
| GSM381251 | RA_TREAT | GSE15258 | GPL570 | GSM566731 | RA_ONLY | GSE22956 | GPL6947 |
| GSM381252 | RA_TREAT | GSE15258 | GPL570 | GSM566734 | RA_ONLY | GSE22956 | GPL6947 |
| GSM381253 | RA_TREAT | GSE15258 | GPL570 | GSM566737 | RA_ONLY | GSE22956 | GPL6947 |
| GSM381254 | RA_TREAT | GSE15258 | GPL570 | GSM607508 | RA_ONLY | GSE24742 | GPL570  |
| GSM381255 | RA_TREAT | GSE15258 | GPL570 | GSM609031 | RA_ONLY | GSE24742 | GPL570  |
| GSM381256 | RA_TREAT | GSE15258 | GPL570 | GSM609033 | RA_ONLY | GSE24742 | GPL570  |
| GSM381257 | RA_TREAT | GSE15258 | GPL570 | GSM609035 | RA_ONLY | GSE24742 | GPL570  |
| GSM381258 | RA_TREAT | GSE15258 | GPL570 | GSM609037 | RA_ONLY | GSE24742 | GPL570  |
| GSM381259 | RA_TREAT | GSE15258 | GPL570 | GSM609386 | RA_ONLY | GSE24742 | GPL570  |
| GSM381260 | RA_TREAT | GSE15258 | GPL570 | GSM609388 | RA_ONLY | GSE24742 | GPL570  |
| GSM381261 | RA_TREAT | GSE15258 | GPL570 | GSM609390 | RA_ONLY | GSE24742 | GPL570  |
| GSM381262 | RA_TREAT | GSE15258 | GPL570 | GSM609392 | RA_ONLY | GSE24742 | GPL570  |
| GSM381263 | RA_TREAT | GSE15258 | GPL570 | GSM609394 | RA_ONLY | GSE24742 | GPL570  |
| GSM381264 | RA_TREAT | GSE15258 | GPL570 | GSM609396 | RA_ONLY | GSE24742 | GPL570  |
| GSM381265 | RA_TREAT | GSE15258 | GPL570 | GSM609398 | RA_ONLY | GSE24742 | GPL570  |
| GSM381266 | RA_TREAT | GSE15258 | GPL570 | GSM618155 | RA_ONLY | GSE25160 | GPL6244 |
| GSM381267 | RA_TREAT | GSE15258 | GPL570 | GSM618156 | RA_ONLY | GSE25160 | GPL6244 |
| GSM381268 | RA_TREAT | GSE15258 | GPL570 | GSM618157 | RA_ONLY | GSE25160 | GPL6244 |
| GSM381269 | RA_TREAT | GSE15258 | GPL570 | GSM618158 | RA_ONLY | GSE25160 | GPL6244 |
| GSM381270 | RA_TREAT | GSE15258 | GPL570 | GSM618159 | RA_ONLY | GSE25160 | GPL6244 |
| GSM381271 | RA_TREAT | GSE15258 | GPL570 | GSM618160 | RA_ONLY | GSE25160 | GPL6244 |
| GSM381272 | RA_TREAT | GSE15258 | GPL570 | GSM618161 | RA_ONLY | GSE25160 | GPL6244 |
| GSM381273 | RA_TREAT | GSE15258 | GPL570 | GSM618162 | RA_ONLY | GSE25160 | GPL6244 |
| GSM381274 | RA_TREAT | GSE15258 | GPL570 | GSM618163 | RA_ONLY | GSE25160 | GPL6244 |
| GSM381275 | RA_TREAT | GSE15258 | GPL570 | GSM618164 | RA_ONLY | GSE25160 | GPL6244 |
| GSM381276 | RA_TREAT | GSE15258 | GPL570 | GSM618165 | RA_ONLY | GSE25160 | GPL6244 |
| GSM381277 | RA_TREAT | GSE15258 | GPL570 | GSM618166 | RA_ONLY | GSE25160 | GPL6244 |
| GSM381278 | RA_TREAT | GSE15258 | GPL570 | GSM618167 | RA_ONLY | GSE25160 | GPL6244 |
| GSM381279 | RA_TREAT | GSE15258 | GPL570 | GSM677339 | RA_ONLY | GSE27390 | GPL570  |
| GSM390153 | RA_TREAT | GSE15602 | GPL570 | GSM677340 | RA_ONLY | GSE27390 | GPL570  |
| GSM390154 | RA_TREAT | GSE15602 | GPL570 | GSM677341 | RA_ONLY | GSE27390 | GPL570  |
| GSM390155 | RA_TREAT | GSE15602 | GPL570 | GSM677342 | RA_ONLY | GSE27390 | GPL570  |
| GSM390156 | RA_TREAT | GSE15602 | GPL570 | GSM677343 | RA_ONLY | GSE27390 | GPL570  |
| GSM390157 | RA_TREAT | GSE15602 | GPL570 | GSM677344 | RA_ONLY | GSE27390 | GPL570  |
| GSM390158 | RA_TREAT | GSE15602 | GPL570 | GSM677345 | RA_ONLY | GSE27390 | GPL570  |
| GSM390159 | RA_TREAT | GSE15602 | GPL570 | GSM677346 | RA_ONLY | GSE27390 | GPL570  |
| GSM390160 | RA_TREAT | GSE15602 | GPL570 | GSM677347 | RA_ONLY | GSE27390 | GPL570  |
| GSM390170 | RA_TREAT | GSE15602 | GPL570 | GSM737461 | RA_ONLY | GSE29746 | GPL4133 |
| GSM390171 | RA_TREAT | GSE15602 | GPL570 | GSM737462 | RA_ONLY | GSE29746 | GPL4133 |
| GSM390173 | RA_TREAT | GSE15602 | GPL570 | GSM737463 | RA_ONLY | GSE29746 | GPL4133 |
| GSM390843 | RA_TREAT | GSE15615 | GPL570 | GSM737464 | RA_ONLY | GSE29746 | GPL4133 |
| GSM390941 | RA_TREAT | GSE15615 | GPL570 | GSM737465 | RA_ONLY | GSE29746 | GPL4133 |
| GSM390942 | RA_TREAT | GSE15615 | GPL570 | GSM737466 | RA_ONLY | GSE29746 | GPL4133 |
| GSM390943 | RA_TREAT | GSE15615 | GPL570 | GSM737467 | RA_ONLY | GSE29746 | GPL4133 |
| GSM390944 | RA_TREAT | GSE15615 | GPL570 | GSM737468 | RA_ONLY | GSE29746 | GPL4133 |
| GSM34398  | RA_TREAT | GSE1919  | GPL91  | GSM737469 | RA_ONLY | GSE29746 | GPL4133 |











|            |          |          |         |            |         |          |          |
|------------|----------|----------|---------|------------|---------|----------|----------|
| GSM1320224 | RA_TREAT | GSE54629 | GPL6244 | GSM1381408 | RA_ONLY | GSE57386 | GPL13158 |
| GSM1320225 | RA_TREAT | GSE54629 | GPL6244 | GSM1381609 | RA_ONLY | GSE57383 | GPL13158 |
| GSM1320226 | RA_TREAT | GSE54629 | GPL6244 | GSM1381616 | RA_ONLY | GSE57383 | GPL13158 |
| GSM1320227 | RA_TREAT | GSE54629 | GPL6244 | GSM1381620 | RA_ONLY | GSE57383 | GPL13158 |
| GSM1320228 | RA_TREAT | GSE54629 | GPL6244 | GSM1381621 | RA_ONLY | GSE57383 | GPL13158 |
| GSM1320229 | RA_TREAT | GSE54629 | GPL6244 | GSM1381624 | RA_ONLY | GSE57383 | GPL13158 |
| GSM1320230 | RA_TREAT | GSE54629 | GPL6244 | GSM1381629 | RA_ONLY | GSE57383 | GPL13158 |
| GSM1320231 | RA_TREAT | GSE54629 | GPL6244 | GSM1381632 | RA_ONLY | GSE57383 | GPL13158 |
| GSM1320232 | RA_TREAT | GSE54629 | GPL6244 | GSM1381634 | RA_ONLY | GSE57383 | GPL13158 |
| GSM1320233 | RA_TREAT | GSE54629 | GPL6244 | GSM1381635 | RA_ONLY | GSE57383 | GPL13158 |
| GSM1320234 | RA_TREAT | GSE54629 | GPL6244 | GSM1382124 | RA_ONLY | GSE57405 | GPL13158 |
| GSM1320235 | RA_TREAT | GSE54629 | GPL6244 | GSM1382125 | RA_ONLY | GSE57405 | GPL13158 |
| GSM1320236 | RA_TREAT | GSE54629 | GPL6244 | GSM1382126 | RA_ONLY | GSE57405 | GPL13158 |
| GSM1320237 | RA_TREAT | GSE54629 | GPL6244 | GSM1382127 | RA_ONLY | GSE57405 | GPL13158 |
| GSM1320238 | RA_TREAT | GSE54629 | GPL6244 | GSM1382128 | RA_ONLY | GSE57405 | GPL13158 |
| GSM1320239 | RA_TREAT | GSE54629 | GPL6244 | GSM1382129 | RA_ONLY | GSE57405 | GPL13158 |
| GSM1320240 | RA_TREAT | GSE54629 | GPL6244 | GSM1382130 | RA_ONLY | GSE57405 | GPL13158 |
| GSM1320241 | RA_TREAT | GSE54629 | GPL6244 | GSM1382131 | RA_ONLY | GSE57405 | GPL13158 |
| GSM1320242 | RA_TREAT | GSE54629 | GPL6244 | GSM1382132 | RA_ONLY | GSE57405 | GPL13158 |
| GSM1320243 | RA_TREAT | GSE54629 | GPL6244 | GSM1562202 | RA_ONLY | GSE63995 | GPL570   |
| GSM1320244 | RA_TREAT | GSE54629 | GPL6244 | GSM1562204 | RA_ONLY | GSE63995 | GPL570   |
| GSM1320245 | RA_TREAT | GSE54629 | GPL6244 | GSM1562206 | RA_ONLY | GSE63995 | GPL570   |
| GSM1320246 | RA_TREAT | GSE54629 | GPL6244 | GSM1562208 | RA_ONLY | GSE63995 | GPL570   |
| GSM1320247 | RA_TREAT | GSE54629 | GPL6244 | GSM119291  | RA_ONLY | GSE7524  | GPL96    |
| GSM1320248 | RA_TREAT | GSE54629 | GPL6244 | GSM119292  | RA_ONLY | GSE7524  | GPL96    |
| GSM1320249 | RA_TREAT | GSE54629 | GPL6244 | GSM183695  | RA_ONLY | GSE7669  | GPL8300  |
